# Supplementary material for: Genome-wide identification and comprehensive analysis of tubby-like protein gene family in multiple crops
Source: Front Plant Sci. 2022 Dec 14;13:1093944. doi: 10.3389/fpls.2022.1093944 (PMC9795058; doi:10.3389/fpls.2022.1093944)
Supplement: Supplementary Table 3 — Protein sequences, theoretical pI and molecular weight of TLP family in all species. [file Table_3.xlsx]

## Sheet: protein-KI-MW
GeneID	ProteinSeq	Theoretical pI		Molecular weight
GmTLP1	MGLIRSMRSRSQRVVQEQEAAECVGVVVGDSMRQSCWANMPQELLREVLLRIEASEDTWPPRKSVVSCAGVCRSWRHITKDIVKTPELSSKITFPISVKQPGPRENLLRCFIKRNRSTQTYYLFLSLTSTLAEDGKFLLAARKCRRPTCTDYIISLDADDMSKGSNSYVGKLRSNFLGTKFTIYDSQLPHTGAKIMKSRSTRLVNLKQVSPKVPTGNYPVAHISYELNVLGSRGPRRMHCVMDSIPATAIEPGGVAPTQTEFSLNNIDMFPSFPFFRSKSNRAENSMSGPLVDQKDGMLVLKNKAPRWHEQLQCWCLNFHGRVTIASVKNFQLVASAENGPAGPEHDKIILQFGKVGKDLFTMDYRYPISAFQAFAICLSSFDTKIACE:	Theoretical pI: 9.44	Molecular weight (average): 43646.37
GmTLP2	MCLIRSMRSQSQRVVQEQEEAECVGDSMRQSCWANMPQELLREVLFRIEASEDAWPPRKSVVACAGVCRSWRQITIDIVKTPELSSKITFPISVKQPGPRENLLRCFIKRNRSSQTYYLYLSLTNTLAEDGKFLLAARKCRRPTCTDYIISLDADDMSKGSNSYVGKLRSNFLGTKFTIYDGQPPHAGAKIMKSRSTRLVNLKQVSPKVPTGNYPVAHISYELNVLGSRGPRRMHCVMDSIPAAAIEPGGVAPVQTEFSLNNIDMFPSFPFFRSKSNRVENSVSGPLVDQKDGMLVLKNKAPRWHEQLQCWCLNFHGRVTIASVKNFQLVASAENRPAGPEHDKIILQFGKVGKDLFTMDYRFPISAFQAFAICLSSFDTKIACE:	Theoretical pI: 9.30	Molecular weight (average): 43331.98
GmTLP3	MSFRSIVRDVRDSFGSLSRRSFDVRLTGHHRGKSQGSVQDLHDQPLVIQNSRWASLPPELLFDIIRRLEESENTWPARKHVVACAAVCQSWRNMCKDIVKSPEFCGKLTFPVSLKQPGPRDGIIQCFIKRDKSNLTYHLFLCLSPALLVENGKFLLSAKRTRRTTYTEYVISMDADNISRSSNTYIGKLRSNFLGTKFIIYDTQPPYSSAHICPPGTGKTSRRFYSKKVSPKVPSGSYNIAQVTYELNVLGTRGPRKMHCVMHSIPASALDAGGTVPGQPELLPRSLEDSFRSISFSKSLDHSIEFSSSRFSEIGESCIEDDDGKMRPLVLKNKPPRWHEQLQCWCLNFRGRVTVASVKNFQLIAATQPAAGAPTPSQPAPPEHDKIILQFGKVGKDMF…	Theoretical pI: 9.41	Molecular weight (average): 47952.01
GmTLP4	MSFRSIVRDVRDGFGSLSRRSFDVRLSGGGKSNSLVHEEHECLPVVQNSRWASLPPELLRDVIKRLEESETTWPARKHVVACAAVCRSWRGMCKEIVTSPEFCGKITFPVSLKQPGSRDGTIQCFIKRDKSNLTYHLFLCLSPALLVENGKFLLSAKRTRRTTCTEYIISMDADNISRSNSTYIGKLRSNFLGTKFIIYDTQPPYNNAQLSPPGRSRRFYSKKVSPKVPSGSYNIAQITYELNVLGTRGPRRMNCTMHSIPMSALEPGCTVPGQPELLPRSLEDSFRSISFARSIDNSTEFSSSRFSDIFLAGKEEEQGKDRPLVLKNKSPRWHEQLQCWCLNFRGRVTVASVKNFQLIAATQPPATGAPTPSSQPAQSDHDKIILQFGKVGKDIFTMD…	Theoretical pI: 9.46	Molecular weight (average): 47621.54
GmTLP5	MSFRSIVRDVRDGFGSLSRRSFDVRISGGGKLNSLVHEAHERQLVIQNSRWASLPPELLCDVIKRLEESESTWPARKHVVACAAVCKSWREMCKEIVTSPEFCGKITFPVSLKQPGSRDGTIQCFIKRDKSNLTYHLFLCLSPALLVENGKFLLSAKRTRRTTCTEYIISMDADNISRSNSTYIGKLRSNFLGTKFIIYDTQPPYNNAQLSPPGRSRRFYSKKVSPKVPSGSYNIAQITYELNVLGTRGPRRMNCTMHSIPMSALEPGCTVPGQPELLPRSLEDSFRSISFARSIDNSTEFSSSRFSDIFVAGNEEEQGKGRPLVLKNKSPRWHEQLQCWCLNFRGRVTVASVKNFQLIAATQPPAAGAPTPSSQPAQSDHDKIILQFGKVGKDIFTMD…	Theoretical pI: 9.46	Molecular weight (average): 47548.48
GmTLP6	MSFRSIVRDVRDSFGSLSRRSFDVRLTGHHRGKSQGSVQDLHDQPLVIQNSRWASLPPELLFDIIRRLEESENTWPARKHVVACAAVCQSWRNMCKDIVKSPEFCGKLTFPVSLKQPGPRDGIIQCFIKRDKSNLTYHLFLCLSPALLVENGKFLLSAKRTRRTTYTEYVISMDADNISRSSNTYIGKLRSNFLGTRFIICDTQPPYSSAHICPPMTGKTSRRFYSKKVSPKVPSGSYNIAQVTYELNVLGTRGPRKMHCVMHSIPASALDAGGTVPGQPELLPRPLEDSFRSISFSKSLDRSIEFSSSRFSEIGESIIEDDDGKMRPLVLKNKPPRWHEQLQCWCLNFRGRVTVASVKNFQLIAATQPPAGAPTPSQPAPPEHDKIILQFGKVGKDMF…	Theoretical pI: 9.48	Molecular weight (average): 48059.27
GmTLP7	MSFRSIVREVRDGFGSLSRRSFEVRLPGHNRGKSRSLVHELQDQPPVIQNSRWASLPPELLRDVINRLEASESTWPGRKHVVACAAVCKSWREMCKEIVSSPEFCGKITFPVSLKQPGHRDGPIQCFIKRDKSKLTYHLFLGLSPALLVENGKFLLSAKRTRRTTCTEYVISMDADNISRSSSTYIGKLRSNFLGTKFIIYDTQPPYNNAMLSPPGRSRRFSKKVSPKVPSGSYNIAQVTYELNVLGTRGPRRMNCTMYSIPASSMEPNGVVPGQPELLPRALEDSFRSISFSKSIDNSTEFSSSRFSDIMGTGIEDEEGKVRPLVLKNKSPRWHEQLQCWCLNFRGRVTVASVKNFQLIASTPPAAVAPTGTGPTPSQPTQSSSDPDKIILQFGKVGK…	Theoretical pI: 9.65	Molecular weight (average): 48068.12
GmTLP8	MSFRSIILERKGFEVKFGYSMRSRSQSHSDAIAQDSLVVLDGLKQSCWANMPPELLRDVLMRIEASEDSWPAQKHVVACAGVCRSWREIMKEIVKSPQLSGKLTFPISLKQPGPRDSLLQCYIKRNRSNQTYYLFLGLNQASTDEGKFLLSARKCRRATHTDYIISLNCDDVSRGSSTYIGKLRSNFLGTKFTVYDAHPPIYGAKVTKSRSTRLVSLKQVSPRVPAGNYPIAHVSYDLNVLGSRGPRIMQCVMDAIPASAVEPGGVAPTQTQFLHSRIDTSPSIPFFRSKSTRMDNLPTVPLTCQNEGTLVLRNKSPRWHEHLQCWCLNFNGRVTVASVKNFQLVASPKNGVSEQAQENVILQFGKVGKDVFTMDYQYPISAFQAFAICLSSFDTKIAC…	Theoretical pI: 9.47	Molecular weight (average): 44763.46
GmTLP9	MSFRSIVRDVRDGFGSLSRRSFEVRLPGHNRGKSRSSVHELQDQPPVIQNSRWASLPPELLRDVINRLEASESTWPGRKHVVACAAVCKSWREMCKEIVSSPEFCGKITFPVSLKQPGHRDGPIQCFIKRDKSKLTYHLFLCLSPALLVENGKFLLSAKRTRRTTCTEYIISMDADNISRSSSTYIGKLRSNFLGTKFIIYDTQPPYHNAMLSPPGRSRRFSKKVSPKVPSGSYNIAHVTYELNVLGTRGPRRMNCTMYSIPASSMEPNGIVPGQPELLPRALEDSFRSISFSKSIDNSTEFSSSRFSDIMGIGNEDEEGKVRPLVLKNKSPRWHEQLQCWCLNFRGRVTVASVKNFQLIAATPPPAIVTTGTGPTPSQPTQSSSDPDKIILQFGKVGK…	Theoretical pI: 9.61	Molecular weight (average): 48203.31
GmTLP10	MSLKSIVRELKEMRDGIGSMSRRGVESRRWNGRTKSHVAPDVILTSLEPIQQGQWANLPPELLLDIIRRVEDSETTWPARAVVVYCGSVCKSWRAVTKEIVKTPEQCGRLTFPISLKQPGPRDSPIQCFIRRNRETSTYLLYIGLVPSENETDKLLLAAKKVRRATGTDFVISLVADDFFRSSNTYVGKLRSNFLGTKFTIYDSQPPQGAAIQPDNRSSRRFHSKQVSPRVPACNYVVSTIAYELNVLRARGPRRMHCTMNSISVSAVQEGGNAPTPTSFPQIIDEPFSPSPALKGKGPIRDLDNASLPELLPVQSQDSAEPLVLKNKAPRWHEQLQCWCLNFNGRVTVASVKNFQLVAAVDPSHNVSAAEQEKVILQFGKIGKDIFTMDYRYPLSAFQ…	Theoretical pI: 9.37	Molecular weight (average): 46341.13
GmTLP11	MSLKSIVRELKEMRDGIGSMSRRGVESRRWNGRTKSHVAPDVTLTSLEPIQQGHWANLPPELLLDIIRRVEDSETTWPARAVVVYCGSVCKSWRAVTKEIVKTPEQCGRLTFPISLKQPGPRDSPIQCFIRRNRETSTYLLYIGLVPSENETDKLLLAAKKVRRATGTDFIISLVADDFSRSSNTYVGKLRSNFLGTKFTIYDSQPPHGAAIQPDSQPSRRFHSKQVSPRVPACNYVVSTIAYELNVLRARGPRRMHCTMNSIPVSAVQAGGNAPTPTFPEIIDEPFSPSPALKGKGPIRDLDNASLPELLPVESQGSAEPLVLKNKAPRWHEQLQCWCLNFKGRVTVASVKNFQLVSAVDPSHNVSAAEQEKVILQFGKIGKDIFTMDYRYPLSAFQA…	Theoretical pI: 9.36	Molecular weight (average): 46094.91
GmTLP12	MSLRSIVRELKEMRDGIGSTSKRGAESKHRLSRTKSHVAPDVLATPFEPIQQGQWANLPSELLLDIIQRVEESETSWPARAVVVFCASVCKSWRSITREIVKTPEQCGRITFPISLKQPGPRDSPIQCFIRRNKETSTYLLYFGLVPSENDSNKLLLAAKRIRRATGTGFVISLAADDFSRASNKYVGKLRSNFLGTKFTVYDSQAPHDSAIQSNCQSSRRFHSKQVSPRVPACSYLVSTVSYELNVLCTRGPRRMHCVMNSIPVSAIQEGGNAPTPTSFPQIFDEPFSPSPALKEKAQVTDLNSASLSEPPVLSQGSTEQLALKNKAPRWHEQLQCWCLNFKGRVSVASVKNFQLVAAVDPSHNISAEEQEKVILQFGKIGKDIFTMDYCYPLSTFQA…	Theoretical pI: 9.18	Molecular weight (average): 46043.62
GmTLP13	MEQSWRANMPRELLREVLLRIESSEATWPSRRSVVACGGVCRTWRLIVKEIVKPPQLSSNITFPISLKQPGPREHLLQCFIRRNSATQTYYLFLSLSSALIADDGKFLLAARKFRRPTCIDYIISLDADDMSRESNAYVGKLRSNFLGTKFTIYDIPLPHVGAKMTKSCFTKLVNPKQVSPRVPTGNYPVAHISYELNVLGSRGPRRMHCVMDTIPASAIEPGGVAVAPSQTDFSVSNIDTSFPFFQTNSTSLENSISGDQRNKKDDVLVLRNKAARWHEQLECWCLNFHGRVTIASVKNFQLAVSPENGHAGPQEDEVILQFGKVGKDLFTMDYRYPISAFQAFAICLSSFATTVACE:	Theoretical pI: 9.06	Molecular weight (average): 40220.18
GmTLP14	MPFRSIVRELKEIGEGISNMYRRGGEAKHVHRHGKSHIAPECSLPPPPPPPPSSSSQSRWANLPPELLLDIIQRLEASETSWPARRALVACASVCRLWREITKDVIKTPEQCGLLTFPISLKQPGPRDSPIQCFIRRERMTSTYCLYLGLSPALSGDMSKLLLAAKKIRRATCTEFIISLVADDFSRACDTYVGKLRSNFLGTKFTILDGEPPHDSSLPLNCKLQQRVHLKQVLPNKVSAANYKVATVSYELNVLRTRGPRRMRCMMHLIPISAIQEGGNAPTPLKFTNYLNDYASTTIPDTKGKKPEVVEFDSTGTDNTPESIQRAREPLILKNKAPRWHEQLQCWCLNFKGRVTVASVKNFQLVAAAEPCQNVSAAEQEKVILQFGKIGKDIFTMDY…	Theoretical pI: 9.29	Molecular weight (average): 47357.84
GmTLP15	MSLRSIVRELKEMRDGIGSTSKRGAESKHWLSRTKSHVAPDILATPFEPIQQGQWANLPSELLLDIIQRIEESETSWPARAVVVFCASVCKSWRSITREIVKTPEQCGRITFPISLKQPGPRDSPIQCFIRRNKETSTYLLYFGLVPSENDGNKLLLAAKRIRRATGTDFIISLAADDFSRASNKYVGKLRSNFLGTKFTIFDSQAPNDVAIQPNCQSSRRFHSKQVSPRLPACNYLVSTVSYELNVLCTRGPRRMYCVMNSIPVSAIQEGGNAPTPASYPQIFDEHFSPSPALKEKVPVTDLNSASLSEPPVSSQCSAEQLALKNRAPRWHEQLQCWCLNFKGRVSVASVKNFQLVAAVDPSHNISAEEQEKVILQFGKIGKDIFTMDYCYPLSTFQA…	Theoretical pI: 9.01	Molecular weight (average): 46248.94
GmTLP16	MSLRKVFRSRKFSKSFKEVLPAEGAAVEGGVAGTVEEAANGNNNGWSSMLPEILGEIVRRVDAAEEQWPNRQNVVACACVCKRWRDITREVVRVPSHTGKITFPSCLKQPGPRDVPHQCLIKRNQKTSTFYLYLALTPSFTDKGKFLLAARRYRCGTHTEYIISLDADDLSQGSNAYVGKLSSDFLGTNFTIYDSQPPHSGAKPSSGRASRRFASKQISPQVPAGNFEVGQVSYKFNLLKSRGPRRMVCSLKCPVTPVSPTSGSSDSTPVNGHKMHDKEQAASGYTILKNKAPRWHEHLQCWCLNFHGRVTVASVKNFQLVATVDQSQPGGKGDEETVLLQFGKVGDDTFTMDYRQPLSAFQAFAICLTSFGTKLACE:	Theoretical pI: 9.37	Molecular weight (average): 41678.40
GmTLP17	MSLRKVFRSRKFSRSFKEVLPAEGAAIVGGEDGVAGAGEESSNGNNGWSNMLPEILGEIVRRVDAAEEQWPNRQNVVACACVCKRWRDITREVVRVPSHTGKITFPACLKQPGPRDVPHQCLIKRNKKTSTFYLYLALTPSFTDKGKFLLAARRYRCGTHTEYIISLDADDLSQGSNAYVGKLSSDFLGTNFTIYDSQPPHSGAKPSSGRASRRFASKQISPQVPAGNFEVGQVSYKFNLLKSRGPRRMVCSLKCPVTPVVSPSVESSDSTPVNGHKIPDKEQVASGYTILKNKAPRWHEHLQCWCLNFHGRVTVASVKNFQLVATVDQSQPGGKGDEETVLLQFGKVGDDTFTMDYRQPLSAFQAFAICLTSFGTKLACE:	Theoretical pI: 9.32	Molecular weight (average): 41987.79
GmTLP18	MLCLMLGKTKTKSTTPIIMPFRSIVRELKEIGEGISNMYRRGGEAKHVHRHGKSHIAPECSLPPPPSSSSSSSSSSSWQSRWANLPPELLLDIIQRLEASETSWPARRALVACASVCKLWREITKDVVKTPEQCGFITFPISLKQPGPRDSPIQCFIRRERMTSTYCLYLGLSPALSGDMSKLLLAAKKIRRATCTEFIISLVSDDFSWASNTYVGKLRSNFLGTKFTILDGEPAHETSLPLNCKLQQRVHLKQVLPNKVAAAANYKVATVSYELNVLRTRGPRRMRCMMHLIPIFAIQEGGNAPTPLKFTTNYLNDHASTTTEHASTTTPDSKGKKPEVVEFDSTGTANTPESIQRAREPLVLKNKAPRWHEQLQCWCLNFKGRVTVASVKNFQLVAA…	Theoretical pI: 9.41	Molecular weight (average): 50583.48
GmTLP19	MIEVQANAMEQSWWANMPHELLREVLLRIESSESTWPLRRSVVACGGVCRTWRRLIVKEIVKPPQFSSNITFPISLKQPGPREHLLQCFIRRNSASQTYYLFLSLSSALVADDGKFLLAARKFRRPTCTDYIISLDADDMSRESNAYVGKLRSTLNQILLLAILLFLFLSAKTNPLSSHFIRSNFLGTKFTIYDRKSCSTELVVNSKQVSPRPRVPTGNYPVAHISYELNVLGSRGPRRMHCVMDTIPASAIEPGGVAVAAPSQTDFSVSNRDTSFPFFQTNSTSLENSISGDQSNKKDDVLVLRNKAARWHEQLQCWCLNFHGRVTIASVKNFQLAVSPENGHAGLQEDEVILQFGKIGKDLFTMDYRYPISAFQAFAICLSSFATTVACE:	Theoretical pI: 9.07	Molecular weight (average): 44015.49
GmTLP20	MKKMNNESSTRTYSSLYFNPLTTTTTAKPHHTFLFDKENSNANGSSVLPKPRPFRSLSTDMILKPCSLESQSLNLNIWDYSDSESGPASSWSTLANKSLICRPLPLDIGSCTCFIVNEPPPQGLSGGTFFSLYTNEGHGRQNRKLAVAHHKRRNGRSHFILAQNLRGLLSHSDDSFLGTVTANLIGSKYHIWDQGYLHNSRAKQPKPPLAVVTYIPTVTTCTGSHRSMRAYIPKHQTMSLKSTTQVQHIKGLPFNWEGKPDKVHQLFSKVPLYNKISKQYELDFRDNKGKAGGGFRIQRSVKNFQLTLEENGRQTILQLGRVEKSKFVMDYSYPLTGYQAFCICLASMDAKLCCTL:	Theoretical pI: 9.63	Molecular weight (average): 40004.66
HvTLP1	MSFRSIVRDVRDGIGSLSRRSFEVTISGLSGLTGHHRGKHQSTVHELRDADLIVQESRWASLPPELLRDVVRRLEASESTWPSRKHVVSCAAVCKAWREMCREIVTSPEFCGKLTFPVSLKQPGPRDGMIQCFIKRDKSKSTYHLYLCLSNAVLAENGKFLLSAKRNRKTTCTEYVISMDAENISRSSSTYIGKLRSNFLGTKFVVYDTQPPYNGAIVPSVGRSSRRFNSKKVSPKVPSGSYNIAQVSYELNVLGTRGPRRMNCIMHSIPASSVEPGGTVPGQPDQIMARALEDSFRSMSSFSKSSIMDRSTDFSSSRYFSSSRFLSDIAGGAISRDEDGENKERPLVLRNKVPRWHEQLQCWCLNFRGRVTIASVKNFQLIAAPSQPPPAPAGAPTPT…	Theoretical pI: 9.61	Molecular weight (average): 50304.48
HvTLP2	MSFRSIARDVRDGFGSLSRRSFDVTIASLYGLTGHHKGKAQSSLDDFLDPAPVIQESRWASLPPELLQDIIRRLEADESTWPSRKHVVCFAAVCKTWREMCKEIVLSPEFSGKLTFRVSLKQPGPRDGMIQCFIKRNKSKSTYQLYLCLTNVVTAETGKFLLSAKRNRKTSCTEYAISMDSANTSRSNRTYIGKLRSNFLGTKFLIYDTQPPYNGAVVPPVGRSSRRFNSTKVSPKVPAVSYNIAQVTYELNVLGTRGPRRMRCIMHSIPASSVEPGGVVPGQPEQIVPRALGDSFRSITSFSQSFRSSATFSRSIMDQSMDFNSARFSEISGGGLTDCDGDGEVKERPLVLRNKPPRWHEQLQCWCLNFRGRVTIASVKNFQLTAASNPPPAGAPTPS…	Theoretical pI: 9.63	Molecular weight (average): 49952.14
HvTLP3	MSFRSIVRDVRDGFGSLSRRGFEVRFLGHRRGKSHSAVHELQDPAPVTQSSCWANLPPELLHDVIERLEASEATWPSRKHVVACAAVCRTWRQMCQEIVKNPEFCGKVTFPVSLKQPGPRDGAIQCFIKRDKSTQTYCLYLCLTSAVVIENGKFLLLAKRYSRPTCTEYTIFMSADNTSRSSNMYIGKLRSNLLGTKFVIYDTQLPCNIPNVSQSGKTSRRFYSRKVSPKASSSTYSIAQVSYELNVLGTRGPRRMNCVMNSIPASSLEAGGTVPCQPDNAVAHSLDESFGSISFSKSSTRDRSIRFSSTRFSDISIGGSRNGGQALGDKDECKEWPLILRNKAPRWHDQLQCWCLNFKGRVTVASVKNFQLVAATQTTAEDRTSSQPAPPPPSEHDKV…	Theoretical pI: 9.39	Molecular weight (average): 48973.86
HvTLP4	MTLRSIVRDFRESFGNLSRRNFEAKISSVPSLSGHYRGKSLESASELQDSLVTDLQGNWASLPPELLRDVMKRLEEDDSNWPSRKDVVACASVCTTWREMCKDIVRNPEFCGKLTFPVSLKQPGSRDGLIQCFIKRDKSKLTYRLYLSLTSAVLDDNGKFLLSAKRSRRTTYTDYAISMDPKNISRSSSGYIGKLRSNFLGTKFIIYDTQPPYNAGKLCPQERTSRRFSSRKVSPKVPAATGSYPIAQVNYELNVLGTRGPRRMQCTMNSIPTSAVDPDGVVPGQPKELLPRLFEESFRTTASSRYSTADHSTDFGSCRFSEFGGGPLREDGGDDNAEDKESPLVLKNKSPRWHEQLQCWCLNFRGRVTVASVKNFQLIAAPAPPPPASGGEAAPEPPS…	Theoretical pI: 9.09	Molecular weight (average): 50956.60
HvTLP5	MSFRSIVRDVRDGFGSLSRRGFDIRILGHGRGRSHGAVHELHDPVPVIQSSCWANLPSELLRDVIERLEASEATWPCRKNVVACAAVCRTWREMCKEIVKNPEFCGKITFPVSLKQPGPRDGTMQCFIKRDRSTQTYYLYLCLTSAVLVENGKFLLSAKRICRATCTEYIISMNANSISRSTDTYIGKMRSNFLGTKFVMYDTQPPYNASSVSHSGTTSRRFYSKKGSAKVPCSTYSIAQVSYELNVLGTRGPRRMRCVMHSIPASSLEAGGSVPCQPDIIFSRSLGESFSSMPVSKSSVMDHSMRFSSARFSDVSIGGGPAIRGQALSDGEDLKDTPLILRNKVPRWHEQLQCWCLNFRGRVTVASVKNFQLTAAAHPAAGAPTPPQPAPAPPPEHDK…	Theoretical pI: 9.44	Molecular weight (average): 48712.96
HvTLP6	MSLKSIVRELKEMRDGIGSMSRRGGVSDGRAGHGRGGSRHSWPSLWPEPQPQPQRPGQEPQQQGQWANLPPELLIDVIQRVESSEVAWPARRYVVACAAVCRTWREVTKDVVKTLEECSRITFPISLKQPGPRDCPVQCFVRRDRATSTYLLYLGLSPSLHGENDKLLLAARKIRRAARTSFVISLISDDFSHSSSTYVGKLKPNFLGTKFTIFDSQPPCDAAVLPNNKPSKRHSKQVSPRLPLGNYNVATVSYELTVLRNRGPRRMQCTMHSIPAVCIQEGGKAPTPTGMVHSLDEQVSTLSTSSKGKEPNIEFSSTSLTADLSGPISTSEAPLLLKNKAPRWHEQLQCWCLNFRGRVTVASVKNFQLVASVDPSLGVPAAEQEKVILQFGKIGKDIF…	Theoretical pI: 9.46	Molecular weight (average): 47291.21
HvTLP7	MPCEEPAAEGEVSEVAEMGEEKEDGQPEEQEERWARLLPELLSEVVRRVEASGGERWPARKDVVSCACVCRRWREAAVAVVRPPAVSGKITFPSSLKQPGPKEFPMQCFIKRNKKNSTFYLYLGLTTATVDKGKFLMAARRFRRGPHTEYIISLDADDLSQGSNAYMGKLRSDFWGTNFKVYDSKPPHDGAKASSSRSSRRFGSRRISPQVSAGNYEVGQLSYKYNLLKSRGPRRMYCALEFPSTQESWENSLKTKSRKPMGTKVLRNKAPRWHEHLQCWCLNFHGRVTVASVKNFQLAAATDPNDPSSSRDEGTVLLQFGKVDDDIFTMDYRQPLSAFQAFAISLSSFGTKLACE:	Theoretical pI: 9.19	Molecular weight (average): 40118.48
HvTLP8	APVPPTPPHLSPRKLPRALGERDHSPARPSIHHGPVAAQLVLAHVLLARAGRHRRRERGHEERWSRLLPELLTDIVRRVDAGAERWPPRRDVVACACACRRWRDAAVSVVRPPLECGRITFPSSLKQPGPRDAPMHCFIRRNKSTSTFYLYLSLTQALTDKGKFLLSARRFRHGAHTEYIISYDSDDLYPGSNSGVGKLRSDFLGTKFIMYDNQKPYDGAKSLKSRSSRRFATKQISPNDSGSNLEVGQVSYRFNFLKSRGPRRMHCSIQCPVDQGSASDPSKETPQSTSSSLSLKNKAPRWHDHLQCWCLNFHGRVTVASVKNFQLVAPAGTSDPWGVGDEETVILQFGKIEDDAFTMDFRYPLSAYQAFAICLTSFGTKLACE:	Theoretical pI: 9.77	Molecular weight (average): 43181.14
HvTLP9	MAATPPKREPLAPLSCNAAAHTPPTAAAARPRAPAVSAEKENLGAANLGPGKEEKKAAPAAAKAPPLKPSSLQARMEGEEAPLARATAAGMPVFVGPRGRELLPPPPPPPVSSSYEAWDLSDNEAAPAASWATLPNRALLCRPLPLDVGRCTCVVVREKATGARGVALYSLYTNEGQGRQDRKLAVARHRRRRGRSEFIVAQNQDGVFGSSDKNFLGTMGANLVGSRYQIWGQGNRADELKSQSKRLLGIIAFAPTIATLTGSFRSMRAWIPKNQSMQLRSNSSAQIQHVNGLPKDWQEKRSRAEQLCSRSPFYNNMTKRYELDFRERVGRMGYKVQTSVKNFQMTLEENGRQTILQLGRVGKSKYIMDFRYPLTGYQAFCICLASMDSKLCCTL:	Theoretical pI: 10.00	Molecular weight (average): 43186.53
SbTLP1	MSFRSIVRDVRDSFGSLSRRSFEVTIAGLSGLTVHHRGKSQSTVHEVCDTDLIIQESRWANLPPELLRDVIRRLEASESTWPNRKHVVSCAAVCRAWREMCREIVLSPEFCGKLTFPVSLKQPGPRDGMIQCFIKRDKSKSTYHLYLCLSTAVLMENGKFLLSAKRNRKTTCTEYVISMDAENISRSSSTYIGKLRSNFLGTKFMISDTQPPYNGAVVPHAGRTSRRFNSKKVSPKVPTGSYNIAQVTYELNVLGTRGPRRMHCVMHSIPASAVEPGGIVPGQPEQILPRALEESFRSTTSFSKSSIMDRSMDFSSSRDFSSARFSDIAGGAAIAGDEEGQNKERPLVLRNKAPRWHEQLQCWCLNFRGRVTIASVKNFQLIAAPSPAPAPAARAPTPS…	Theoretical pI: 9.57	Molecular weight (average): 50160.50
SbTLP2	MSFRSLIQDMRDEFGSISRHSLRSRSHRSAGNASRAAAAGPSEAMDQSCWAQLPPELLREVLVRIEASESWWPARRDVVSCAGVCRTWRGIMKEAVRVPEVSGKLTFPISLKQPGPRDGTLKCFIRRNRTTQTYYLYIGLTEALADDGKFLLAARKCRKPTCTDYLISLDKVDMSKGSSTYIGKLRSNFLGTKFTVYDAHPPYDGAVVSKSRSARVVGLNQVSPRVPAGNYPVSHISYELNVLGSRGPRRMNCVMDSIPASAVEEGGKAPTQTEFPLSSLDSFPSIPFFRSKSARIDSSTSQSSRSDRLVLKNKSPRWHEQLQCWCLNFRGRVTVASVKNFQLVASDDNGPGNQDNNKVILQFGKIGKDLFTMDYRYPISAFQAFAICLSSFDTKIACE:	Theoretical pI: 9.60	Molecular weight (average): 44381.61
SbTLP3	MSFRSIVRDVRDGFGSLSRRGFEVKILGHRRGRSHGAVHELHDPAPVIQSSCWANLPPELLRDVIERLEASEATWPNRKNVVSCAAVCRTWREICKEIVKNPEFSGKITFPVSLKQPGPRDVTIQCFIKRDKSTQTYYLYLCLSTAVLVESGKFLLCAKRTSRPTCTEYTIFMNSENLSRSSKMYIGKLRSNLLGTKFAIYDTQPPCNTSQPGKTSRRFYSRKVSPKVSSRTYNIAQVSYELNVLGTRGPRRMNCVMHSIPASCLEAGGTVPCQPDSILARSIDESFGSISFSKSSVVDHSMRFSSTRFSEISMSSHTIGDAALGDNDECKDRPLILRNKAPRWHEQLQCWCLNFKGRVTVASVKNFQLVAATQPSAGAPTLSSQATPVPPPEHEKVIL…	Theoretical pI: 9.42	Molecular weight (average): 48855.10
SbTLP4	MSFRSIVRDVRDGFGSLSRRSFEVTLASIYGLTGHHKGKTQSSLHELDDSPSIIRESRWANLPPELIRDIIRRLEADESTWPARKHVVCFAAVCRTWREMCKEIVLSPELCGKLTFPVSLKQPGPRDGNTMIQCFIKRNKSKSTYYLYLCLSNVVTSESGKFLLSAKRHRKTTCTEYTISMDSGNISRSSRTYIGKIRSNFLGTRFLIYDTQPPYNGAVVPPSGRTSRRFNSTKVSPKLPSVSYNIAQVSYELNVLGTRGPRRMRCIMHSIPASSVEPGGIVPGQPEQIVPRALEDSFRSTASFSQSFRSTTSLSKSIMDSSMDFNSARFSDIGGSSARFTGIPGSSARFTGIPGSSARFSGIAEGRLDNDEESETKERPLVLRNKPPRWHEQLQCWCL…	Theoretical pI: 9.72	Molecular weight (average): 53411.92
SbTLP5	MSFRSIVRDVSESFGSLSRRSFEVRISGLPGLSGHHRGKSVGSLSDRPVVVDQSRWVGLPPELLRDVMKRLEEGESNWPSRKNVVACAAVCGTWREICKDIVLSPEFCGKLTFPVSLKQPGPRSGMIQCFIKRDKSTSTYYLYLCLSPAVLSEDGKFLLAAKRNRRTTYTEYIISVDRKNISRSSNGYVGKMRSNFLGTKFVVYDTQTPHNAGSLLSCERGSRRISSRRVSPKVPTASYPIARVNYELNLLGTRGPRRMNCTMHSIPASALDPEGMVPGQPKQLFIPGSSSFGESFRSANTSSSSRFSVTDRSLDFSSSRFSEISGLAQQDEGSGQAKERPLALRNKEPRWHEQLQCWCLNFRGRVTVASVKNFQLIAAPQLDSESSQQAQQQAQPSNS…	Theoretical pI: 9.64	Molecular weight (average): 49914.76
SbTLP6	MSFRSIVRDVRDGFGSLSRRGFEVRFLSPRRGKSHGAVHELHDPVPVVQSSCWASLPPELLRDVIERLETSEDTWPSRKHVVACAAVCRTWREMCREIVKSPEVSGKITFPVSLKQPGPRDGTIQCFIKRDKSTQVYSLYLSFSSAVPAEDGKFLLSAKRNCRPTYTEYTISINSGDISRSTSNNTYIGKLRSNFLGTKFVIYDTQPPYNATSPTVAGKTNQRFYSKKGGSTKGSCSRYSIGQVSYELNVLGTRGPRRMNCVMHSIPASCLEAGGSVPCQPDSIVAHSVGEMFSSIPLSKSSTMDHSMHFSSSRFSDAITADAIVSGGQALSNADDEESTDTPLVLRNKAPRWHEQLQCWCLNFRGRVTVASVKNFQLVAAVMTQPAVGAPTPSQAAPL…	Theoretical pI: 9.03	Molecular weight (average): 49975.92
SbTLP7	MSFRSMVRDIRESFGNISRRNFEVRIHHRGKSLGSSSDLQDKPAEIQQSRWASLPPELLRDVMKRLEEDDSSWPDRKDVVCCASVCTTWRDMCKDIVRSPEHCAKLTFPISLKQPGPRDGVIQCFIKRDKSKLTYRLYLSLSSAVLDENGKFLLAAKRSRRMAHTEYAIFMGSRNFSRSSTGYIGKLRSNFLGTKFIIYDTQPPYNAGKLCAQERAPSRRLSSRKVSPRVPTGSYPIAQVNYELNVLGTRGPRRMQCAMHSIPASAVEPGGVVPGQSKELLPRLFDESFSSTATSFSKYSVVDSSMDLSSCRFSELSGGALQEGSDDSEKERPLVLRNKAPRWHEQLQCWCLNFRGRVTVASVKNFQLISSVPQPAPVGVSSAPPLAVTPPTQTQPQAS…	Theoretical pI: 9.49	Molecular weight (average): 50528.66
SbTLP8	MSLKSIVRELKEMRDGIGSMSRRGGSGSDGRAGHGRSGSRHSWPSLWAEQQQPQRQGQEGPQHQHQHQGRWANLPPELLLDVIQRVESSEATWPARRQVVACAAVCRSWREVTKEVVKTLEECGRITFPISLKQPGPRDLPVQCFVRRERATSTYLLYLGLSPSMNMENDKLLLAARKVRRATRTSFVISLVSDDFSHSSSTYVGKLKPNFLGTKFTIFDSQPPPDAVVLPNNKPSKRQSKQVSPRLPLGNYNVATVTYELTVLRNRGPRRMQCTMHSIPAECIQEGGKAPTPTGTIQSLDEPVSTSPSTKGKEVALEFSSTSLSADLSGLALACANETPLVLKNKAPRWHEQLQCWCLNFRGRVTVASVKNFQLVASVDPSLNIPAAEQEKVILQFGK…	Theoretical pI: 9.52	Molecular weight (average): 48062.95
SbTLP9	MSRHAAPAAPPPLPERGEMDEVVEADPDAEAEDQEERWARLLPELLSDVVQRVEASGGERWPARKDVVSCACVCRRWREAAVAVVRPPAESGKITFPSSLKQPGPRESPMQCFIKRNKKNSTFYLYLGFTSSPVDKGKFLMAARRFRRGPHTEYIISLDSEDLSQGSNAYMGKLRSDFWGTNFKIYDSKPPYDGAKASSSRSSRRFGSRRISPQVSAGNYEVGQVSYKYNLLKSRGPRRMYCTLECPSAQETWENSLKTKFRRPLGPTTLRNKAPRWHEHLQCWCLNFHGRVTVASVKNFQLVAAADPSDPTSSVDDETVLLQFGKVDEDMFTMDYRQPLSAFQAFAISLSSFGTKLACE:	Theoretical pI: 9.06	Molecular weight (average): 40555.89
SbTLP10	MISWRRSASWLSSASRSSLGAAVGGEAKVTPEVDPAAAQEMEEDEEADEERWSRLLPELLTEIMRRVDAGAERWPPRRDVVVCACVCRRWRDAAVSVVRPPLECGRITFPSSLKQPGPRDAPMHCFIRRDKKNSTFSLYLSLTQALTDKGKFLLAARRFRQGAHTEYIISYDYDDLHPRSSSYVGKLRSDFLGTKFIIYDSQAPYDGAKPSRSRSTRRFASKQISPQVSGGNFEVGQVTYKFNFMKSRGPRRMQCNIQCPVSQGTMSDPSKEKTPSSSSLDLKNKAPRWHDHLQCWCLNFHGRVTVASVKNFQLVATAGSGGPWGVGDEETVILQFGKIEDDAFTMDYRQPLSAFQAFAICLTSFGTKLACE:	Theoretical pI: 9.08	Molecular weight (average): 41704.30
SbTLP11	MPFSSMIHEMKGEIGAISSRGLLRFRSGGHAAAAGRASAAAEPDEALRESCWARVPPELLRMVLARVEHEEARWPGRSAVVASAGVCRCWRAVVKEMVRVPEVSGKITFPISLKQPGPRDAPMKCFIRRNRATQSYSLCIGITDALADDGKFLLAARRSRRPAGTEYLISLDAKNTSKGTCIGKLRSNFLGTKFTVYDAHPPCTGAVVSKGPSAHMIGSAQVSPGVPAGNYPISHISYEATFGSRYPRKMNCVMDSIPLSAIKEGGTAPTQTEFPSINSNSFASVPFFRKSGRLDSSGVQLATQNEAKMVLKNKSPNWHEPLQCWCLNFHGRVTVASVKNFQLVASGESDLNNQGDDDVILQFGKVGKDLFTMDYRYPISAFQAFAICLSSFDTKITRE:	Theoretical pI: 9.42	Molecular weight (average): 43444.77
SbTLP12	MAAPLVPREEGLRQEGAVEQEEEDRWACLLPELLAEVLRRLEASGGERWPARKDVVSCACVCRRWRDVAATVVRPLPESGKITFLASLKQPGPKDFPIQCFIKRNKKNSLFYLYLGLTNNPMMPATDKGKFLMAAKRFRRGAPTEYIISLDADDISQGNKAYVGKLRSDFLGTNFKIYDSQPPYDGAKASSTRSIRRFGSRRISPQVSSGNFDVGQVSYKYNLLKSRGPRRMLCTMECPSVQETWENSLKVMSFRQTGSTILRNNAPRWHEHLQCWCLNFHGRVTVASVKNFQLVATTDTSHPDSVDDAEIVLQFGKDGCVHQLSHPLMSSGLPGAITMAFAVRGYLYLFFRNGFCGATYKLHKFALQSCFMDRRYM:	Theoretical pI: 9.44	Molecular weight (average): 42638.06
SbTLP13	MATATTTPNPKATTTRARREPLRPRSNNSAASPSPAVASARRGPAASAEKENQRPKSLGHGKKEEGKTAAAAAATTATELLKPAEPAPAVAPPPPAPPLKPSSLQLRMKDEAAEAAAAAQAPPAFVVGPRGRELLLPPPSSNYEAWDLSDSESAPASSWATLPNRALLCRPLPQDVGRCTCVIVREAATGARGVALYSLYTNEGQGRQDRKLAVARHRRRRGRSEFIVAQNQDGIFCTADNNFLGTVGANLVGSKYQIWGQGGSRADELNNQAKRLLGVVAFAPTITTLTGSFRSMRAWIPKNQSMQLKTNNSAQHVSGLPKDWQEKKSRADQLCSRAPFYNHMTKRYELDFRERAGRMGYKVQTSVKNFQMTLEENGRQTVLQLGRVGKSKYIMDFRY…	Theoretical pI: 10.00	Molecular weight (average): 45821.15
SbTLP14	MATATTTPNPKATTTRARREPLRPRSNNSAASPSPAVASARRGPAASAEKENQRPKSLGHGKKEEGKTAAAAAATTATELLKPAEPAPAVAPPPPAPPLKPSSLQLRMKDEAAEAAAAAQAPPAFVVGPRGRELLLPPPSSNYEAWDLSDSESAPASSWATLPNRALLCRPLPQDVGRCTCVIVREAATGARGVALYSLYTNEGQGRQDRKLAVARHRRRRGRSEFIVAQNQDGIFCTADNNFLGTVGANLVGSKYQIWGQGGSRADELNNQAKRLLGVVAFAPTITTLTGSFRSMRAWIPKNQSMQLKTNNSAQIQHVSGLPKDWQEKKSRADQLCSRAPFYNHMTKRYELDFRERAGRMGYKVQTSVKNFQMTLEENGRQTVLQLGRVGKSKYIMDF…	Theoretical pI: 10.00	Molecular weight (average): 46062.44
OsTLP1	MSFRSIVRDVRDSFGSLSRRSFEVTLAGLSGLTGHHRGKSQSTVHELCDADLIIQESRWASLPPELLRDVIRRLEASESTWPSRKDVVSCAAVCKAWREMCKEIVLSPEFCGKLTFPLSLKQPGPRDGMIQCFIKRDKSKSTYHLYLCLSTAVLADSGKFLLSAKRHRKTTCTEYVISMDADNISRSSSTYIGKLRSNFLGTKFIIYDTQPSYNGAVIPPVGRSSRRFNSKKVSPKMPSGSYNIAQVTYELNVLGTRGPRRMHCVMHSIPASSVEPGGIVPGQPEQIVPRAFEESFRSTTSFSKSSIMDRSMDFSSSRDFSSARFSDIAGGTINGDEEGQNKERPLVLRNKAPRWHEQLQCWCLNFRGRVTIASVKNFQLIAAPAQPPAGAPTPSQPAP…	Theoretical pI: 9.43	Molecular weight (average): 49554.74
OsTLP14	YSSLRDVQPGPRDGTLKCFIRRNRTTQTYYLYIGLTEALADDGKFLLAARKCRKPTCTDYLISLDMSDMSKGSNTYIGKLRSNFLGTKFTVYDAHPPYDGAVVSKSRSARVVGLNQVSPRVPAGNYPVSHISYELNVLGARGPRRMNCIMDSIPTSAVQEGGKAPTQTEFPLSGLDSFPSISFFRSKSARIDSATSQLSTQKEEKLVLKNKSPRWHEQLQCWCLNFRGRVTVASVKNFQLVASDENGPTNQEQDKVILQFGKIGKDLFTMDYRYPISAFQSFAICLSSFDTKIACE:	Theoretical pI: 9.33	Molecular weight (average): 33054.66
OsTLP7	MSFRSVIQEVKGEIGAISRRGFRSRPGRVRRVAAAAEEPPDESSAAALVMRESCWTQLPPELLREVLARVEESEGWWPRRRDVVACAGVCRSWRGIVREIVRTPEASGNLTFPISLKQPGPRDAPMKCFIVRNRTTQTYYLYIGLTDALTDDGKFLLAARKCRRTTCTEYLISLDMNDISKRTDSYVGKLRSNFLGTKFTIYDAHPPYAGDVISKGQSARVIGSNHLSPRIPAGNYPVSHISYELNVLGSRGPRRMHCAMDSIPVSAIEQGGTAPTQTEFPLSYHESFTSIPFFKSKSVRANNSTASLLTQNGSKLVLKNKSPRWHEHLQCWCLNFHGRVTVASVKNFQLVASDESNPTNQEHDDVILQFGKVGKDMFTMDYRYPISAFQAFAICLSSF…	Theoretical pI: 9.28	Molecular weight (average): 45454.83
OsTLP4	MSFRSIVRDVRDGFGSLSRRGFEVRLVGHRRGRSHSAVHELRDGHAAAAAADVVQSSCWANLPPELLRDVIERLEASEAAWPSRKNVVACAAVCRTWRDMCREIVKNPEFCGKITFPVSLKQPGPRNGAIQCFIKRDKSTQTYNLYLCLSSAVLVESGKFLLSAKRYSRATCTEYTIFMSADNTSRSSNMYIGKLRSNLLGTKFVIYDTQPPCNTANVSQSGKTSRRFYSRKVSPKNPSSTYSIAQVSYELNVLGTRGPRRMNCVMHSIPASSLEAGGTVPCQPDSVLARSLDESFGSISFSKSSIMDRSIRFSSSRYSDISVGGPMVGGQALGDSDESKERPLILRNKAPRWHEQLQCWCLNFKGRVTVASVKNFQLVAATQPAAGAPTPSQPAPPPP…	Theoretical pI: 9.56	Molecular weight (average): 49087.07
OsTLP3	MSFRSIVRDFRDSFGTLSKRSFEVKISGFSGRHRGKSIGPSSELDDTPVVAQQSKWAGLPPELLRDVMKRLEEDDSNWPSRKDVVACASVCTTWRDMCKDIVRNPEFCGKLTFPVSLKQPGPRDGVIQCFIKRDKSKLTYHLYLCLSSAVLDETGKFLLSAKRSRRTTHTDYIISMDSKNISRSSSGYIGKLRSNFLGTKFIIYDTQPPYNARTLCSQERTSRRFSSRKVSPKVPTGCYPIVQVNYELNVLGTRGPRRMQCAMHSIPASAVEPGGIVPGQPKELLPRLFEESFRSMATSFSKYSITDHSTDFSSSRFSEFGGGALQGQEQEQDGDDVNKERPLVLRNKAPRWHEQLQCWCLNFRGRVTVASVKNFQLIAAAPQPSSGAASEPSQAGQAA…	Theoretical pI: 9.35	Molecular weight (average): 51529.37
OsTLP2	MSFRSIVRDVRDSFGSLSRRSFEVRISGLPGLSGHHRGKSLGSLSELRDRPVVVDQSRWVGLPPELLRDVMKRLEEGESNWPSRKDVVACAAVCRTWREICKDIVQSPEICGKLTFPVSLKQPGPRDGLIQCFIKRDKSKLTYYLYLCLSPAVLSENGKFLLAAKRNRRATSTEYIISVDSKNISRSSNGYVGKMRSNFLGTKFVVYDTQPPYNAGSLMSCQHGSRRISSRRVSPKLPTGSYPIAHVKYELNVLGTRGPRRMQCTMHSIPASAVDPEGVVPGQPEQLLPGPFEESFRSTNTSSRFSFMDRSLDFSSSRFSEISGSANQQGEDDIPEAKERPLVLRNKVPRWHEQLQCWCLNFRGRVTVASVKNFQLIAAASSESSQLEQQQQQQQQNHA…	Theoretical pI: 9.53	Molecular weight (average): 50528.48
OsTLP5	MSFRSIVRDVRDGFGSLSRRSFEVTLASLYGLTGHHKGKTQSSLDELDDSPAIIPESRWASLPPELLREVIRRLEADESTWPSRRNVVCFAAVCRTWREMCKETVLSPEFCGKLTFPVSIKQPGPRDGMIQCYIKRNRSKSTYHLYLCLSNVVTAEGGKFVLAAKRHRKTTCTEYTISMVSGNISRSSRTNIGKLRSNFLGTKFIIYDTQPPYNGAVVPHVGRTSKRFNSTKVSPKVPSVTYNIAQVSYELNVLGTRGPRRMRCMMHSIPASSVEPGGIVPGQPEQIVPRALEDSFRSTTSFSQSFRSTTSFSKSIMDPSMDFSSARFSDISGSIMGGDDNGEIKERPLVLRNKPPRWHEQLQCWCLNFRGRVTIASVKNFQLVAAPSPPPAGAPTPSQ…	Theoretical pI: 9.64	Molecular weight (average): 49924.21
OsTLP8	MSLKSIVRELREMRDGIGSMSRRAADGRAGGGRGGSRHSWPVLWSEQQQPPQQQQLQRQEHQQQQGRWANLPPELLLDVIQRVEASEATWPARRQVVACAAVCRSWREVTKEVVKTLEECGRITFPISLKQPGPREHPVQCFVRRDRATSTYLLYLGLSPSLHGENDKLLLAARKIRRATRTSFVISLVSNDFSLSSSTYVGKLKPNFLGTKFTIFDSQPPCDAVVLPNNRPSKRHFKQVSPRLPLGNYNVATVSYELTVLRNRGPRRMQCTMHSIPALCIQEGGKAPTPTGIIHSLDEQVPALSTSKGKEPAIEFSSTSLSADLSGPVCTNEVPLVLKNKAPRWHEQLQCWCLNFRGRVTVASVKNFQLVASVDPSLGIPAAEQEKVILQFGKIGKDI…	Theoretical pI: 9.62	Molecular weight (average): 47760.87
OsTLP10	MALWRCSSSWLSSVSRSSGGVGGGESKVSPEIAPVSGGEGEGEEEEGEEERWSRLLPELLTEIMRRVDAGAERWPPRRDVVACACVCRRWRDAAVSVVRPPLECGRITFPSSLKQPGPRDAPMHCFIRRNKKNSTFYLYLSLTQALTDKGKFLLAARRFRNGAHTEYIISYDCDDLFPGSNSYVGKLRSDFLGTKFIIYDSQPPYDGAKPSRSQSSRRFASKQINPNVSGGNYEVGQVSYKFNFLKSRGPRRMQCNIQCPVGQSTASDPLKKLISTSSPLALRNKAPRWHEHLQCWCLNFHGRVTVASVKNFQLVAPAGTSDPWGIADEETVILQFGKIEDDAFTMDYRQPLSAFQAFAICLTSFGTKLACE:	Theoretical pI: 9.00	Molecular weight (average): 41458.06
OsTLP9	MPRETPPPPPPEGGEVHEVVEGEDGQAEDQEERWARLLPELMSEVVRRVEASGGERWPARKDVVSCACVCRRWRDAAVAVVRPPAESGKITFPSSLKQPGPREFPMQCFIKRNKKNSTFYLYLGLTNATVDKGKFLMAARRFRRGPHTEYIVSLDADDLSQGSNAYMGKLRSDFWGTNFKIYDSKPPYDGAKASSSRSSRRFGSRRISPQVSAGNYEVGQVSYKYNLLKSRGPRRMYCALECPSTQETWENCLKTKFRKPTGNTVLRNKAPRWHEHLQCWCLNFHGRVTVASVKNFQLVAAADPNDPASSKDEETVLLQFGKVDDNIFTMDYRQPLSAFQAFAISLSSFGTKLACE:	Theoretical pI: 9.22	Molecular weight (average): 40178.55
OsTLP11	MAAVREPREEAAVGEGEGEEEGRWGGLLPELVEEVVRRVEASGGERWPARKDLVSCACVCRRWREAAAAVVRPLPESGRITFPSSLKQPGPKDFPIQCFVKRNKKKSMFYLYLGLLNGTMDKGKFLMAARRFRRGPHTEYVISLDADDLSQGSNAYVGKLRSDFWGTNFKIYDNQPPYDDAKTSSTRSSQRFGSTHRFGSRRICPQISAGNFNVGQISYKYNLLKSRGPRRMFCTMECPSTQETWENSLKTKSLRCTGTTVLRNKAPRWHEHLQCWCLNFHGRVTVASVKNFQLVATADPSHPDSVGDEETVILQFGKVDSNIFTMDYRQPLSAFQAFAICLSSFGTKLACE:	Theoretical pI: 9.24	Molecular weight (average): 39679.14
OsTLP12	MVPWRRSSSSSSAPSSRPARRPARTNARVSPDVSSELSPLAGEEGAGEERWSALVPDLLADILRCVEAGSERWPPRRDVVACASVCRRWRDVAVAVVQPPLESGKITFPSSLKQPGPRDAPMQCFIKRNKKNSTFFLYLGLTQELTDDEKFLLAARRCRRGLHKEYAITINSDGLFHGSQSCVGNLKSNFTGTKFTIRDWQPPYEGAKAFSSRSGRWFGNKHRCPLVSTGDVEVGEVSYKYSLLRPRGPRRMSCSVQCPVLKGTAVDPQDGKRLSNSIPSSLVLNSKVPSWHEHLQCWCLNFHGRVMVASVKNFQLIAPVEPGEPSDKTVVLQFGKIDDDVFTMDYRQPLSAFQAFAICLSNFGTKLA:	Theoretical pI: 9.49	Molecular weight (average): 40876.69
TaTLP1	MSFRSIVRDVRDGFGSLSRRSFDVTISGLSGLTGHHRGKCQSTVHELRDADLIVQESRWASLPPELLSDVIRRLEASESTWPSRKHVVSCAAVCKAWREMCREIVTSPEFCGKLTFPVSLKQPGPRDGMIQCFIKRDKSKSTYHLYLCLTNAVLVENGKFLLSAKRIRRTTCTEYVISMDAENISRSSSTYIGKLRSNFLGTKFIVYDTQPPYNGAIVPSIGRSSRRFNSKKVSPKVPSGSYNIAQVSYELNVLGTRGPRRMNCIMHSIPASSVEPGGIVPGQPDQIMPRALEDSFRSMSSFSKSSIMDRSTDFSSSRYFSSSRFLSDIAGGAISRDEDGENKERPLVLRNKVPRWHEQLQCWCLNFRGRVTIASVKNFQLIAAPSQPAPPPAGAPTPT…	Theoretical pI: 9.54	Molecular weight (average): 50538.88
TaTLP2	MSFRSIVRDVRDGFGSLSRRSFEVTISGLSGLTGHHRGKCQSTVHELRDADLIVQESRWASLPPELLSDVIRRLEASESTWPSRKHVVSCAAVCKAWREMCREIVTSPEFCGKLTFPVSLKQPGPRDGMIQCFIKRDKSKSTYHLYLCLTNAVLVENGKFLLSAKRIRRTTCTEYVISMDAENISRSSSTYIGKLRSNFLGTKFIVYDTQPPYNGALVPPVGRSSRRFNSKKVSPKVPSGSYNIAQVSYELNVLGTRGPRRMNCIMHSIPASSVEPGGVVPGQPDQIMPRALEDSFRSMSSFSKSSIMDRSTDFSSSRYFSSSRFLSDIAGGAISRDEDGESKERPLVLRNKVPRWHEQLQCWCLNFRGRVTIASVKNFQLIAAPSQPPPPAAGTPAPT…	Theoretical pI: 9.54	Molecular weight (average): 50507.86
TaTLP3	MSFRSIVRDVRDGFGSLSRRSFEVTISGLSGLTGHHRGKCQSTVHELRDADLIVQESRWASLPPELLSDVIRRLEASESTWPSRKHVVSCAAVCKAWREMCREIVTSPEFCGKLTFPVSLKQPGPRDGMIQCFIKRDKSKSTYHLYLCLTNAVLVENGKFLLSAKRIRRTTCTEYVISMDAENISRSSSTYIGKLRSNFLGTKFIVYDTQPPYNGALVPPVGRSSRRFNSKKVSPKVPSGSYNIAQVSYELNVLGTRGPRRMNCIMHSIPASSVEPGGIVPGQPDQIMPRALEDSFRSMSSFSKSSIMDRSTDFSSSRYFSSSRFLSDIAGGAAISRDEDGEKERPLVLRNKVPRWHEQLQCWCLNFRGRVTIASVKNFQLIAAPSQPPPPATGAGAPA…	Theoretical pI: 9.54	Molecular weight (average): 50604.00
TaTLP5	MSFRSIARDVRDGFGSLSRRSFDVTIASLYGLTGHHKGKAQSSLDDFLDPAPVIQESRWASLPPELLQDIIRRLEADESTWPSRKHVVCFAAVCKTWREMCKEIVLSPEFSGKLTFRVSLKQPGPRDGMIQCFIKRNKSKSTYQLYLCLTNVVTAETGKFLLSAKRNRKTSCTEYAISMDSANTSRSNRTYIGKLRSNFLGTKFLIYDTQPPYNGAVVPPVGRSSRRFNSTRVSPKVPAVSYNIAQVTYELNVLGTRGPRRMRCIMHSIPASSVEPGGVVPGQPEQIVPRALGDSFRSITSFSQSFRSSATFSRSIMDQSMDFNSARFSEISGGGVTDGDGEGEVKERPLVLRNKPPRWHEQLQCWCLNFRGRVTIASVKNFQLTAASNPPPAGAPTPS…	Theoretical pI: 9.68	Molecular weight (average): 49948.09
TaTLP6	MSFRSIARDVRDGFGSLSRRSFDVTIASLYGLTGHHKGKAQSSLDDFLDPAPVIQESRWASLPPELLQDIIRRLEADESTWPSRKHVVCFAAVCKTWREMCKEIVLSPEFSGKLTFRVSLKQPGPRDGMIQCFIKRNKSKSTYQLYLCLTNVVTAESGKFLLSAKRNRKTSCTEYAISMDSANTSRSNRTYIGKLRSNFLGTKFLIYDTQPPYNGAVVPPVGRSSRRFNSTRVSPKVPAGSYNIAQVTYELNVLGTRGPRRMRCIMHSIPASSVEPGGVVPGQPEQIVPRALGDSFRSITSFSQSFRSSATFSRSIMDQSMDFNSARFSEISGCGGVTDGDGEGEVKERPLVLRNKPPRWHEQLQCWCLNFRGRVTIASVKNFQLTAASNPPPAGAPTP…	Theoretical pI: 9.64	Molecular weight (average): 49995.12
TaTLP7	MSFRSIVRDVRESFGSLSRRGFDVRISGLPGLSGHHHRGKSFGPPVEPHGGAVVADQNGWVGLPPELLRDVMKRLEEGESTWPSRKDVVACAAVCSAWREICKDIVQSPEFCGKLTFPVSLKQPGPRDGLIQCFIRRDKSTLTYYLYLCLSPAVLSENGKFLLAAKRNRRTTYTEYVISVDSKNISRSSNGYVGKMRSNFLGTKFIVYDTQPPYNAGSLIPCQRGSRRISSRRVSPKVPTGSYPIAQVNYELNVLGTRGPRRMQCTMHSIPASAVDPDGVVPGQPQQLLPGPFDESFRSTNASSRFSMADFSSSRFSSSRFSDVSGGLRREEEDGDAKERPLVLRNKVPRWHEQLQCWCLNFRGRVTVASVKNFQLTAAAPQVAAVPPSEPSQPPQQQQ…	Theoretical pI: 9.50	Molecular weight (average): 50635.58
TaTLP8	MSFRSIVRDVRESFGSLSRRGFDVRISGLPGLSGHHHRGKSFGPPGEPHGGAVVADQNGWVGLPPELLRDVMKRLEEGESTWPSRKDVVACAAVCSAWREICKDIVQSPEFCGKLTFPVSLKQPGPRDGLIQCFIRRDKSTLTYYLYLCLSPAVLSENGKFLLAAKRNRRTTYTEYVISVDSKNISRSSNGYVGKMRSNFLGTKFIVYDTQPPYNAGSLVPCQRGSRRISSRRVSPKVPTGSYPIAQVNYELNVLGTRGPRRMQCTMHSIPASAVDPDGVVPGQPQQLLPGPFDESFRSTNASSRFSMADFSSSRFSSSRFSDVSGGLRREEEDGEAKERPLVLRNKVPRWHEQLQCWCLNFRGRVTVASVKNFQLTAAAPQVAAAALPPSEPSQPPQQ…	Theoretical pI: 9.50	Molecular weight (average): 50723.60
TaTLP9	MSFRSIVRDVRESFGSLSRRGFDVRISGLPGLSGHHHRGKSFGPPGEPHGGAVVADQNGWVGLPPELLRDVMKRLEEGESTWPSRKDVVACAAVCSAWREICKDIVQSPEFCGKLTFPVSLKQPGPRDGLIQCFIRRDKSTLTYYLYLCLSPAVLSENGKFLLAAKRNRRTTYTEYVISVDSKNISRSSNGYVGKMRSNFLGTKFIVYDTQPPYNAGSLVPCQRGSRRISSRRVSPKVPTGSYPIAQVNYELNVLGTRGPRRMQCTMHSIPASAVDPDGVVPGQPQQLLPGPFDESFRSTNASSRFSMADFSSSRFSSSRFSDVSGGLRREEEDGEAKERPLVLRNKVPRWHEQLQCWCLNFRGRVTVASVKNFQLTAAAPEVTAAAVPPSEPSQPPQQ…	Theoretical pI: 9.45	Molecular weight (average): 50740.58
TaTLP10	MSFRSLIQDMKDEFGNISRHGLRSSRSHRAAAGAGAPRGASVGLGLADALEGTCWAQLPPELLREVLVRIEDSQGCWPSRRDVVACAGVCRAWRGIMKEVVRVPEASAKLTFPISLKQPGPKDGTLKCFIRRNRTTQTYYLYIGLTEALADDGKFLLAARKCRKPTYTDYLIYLDMGDMSKGSSTYIGKLRSNFLGTKFTVYDAHPPYDGAVVSKSRSARVIGLNQVSPRVPAGNYPVSHISYELNVLGSRGPRRMNCVMSSIPASAVEEGGKAPTQTEFPLGNLDSFPSIPFFRSKSARIDSALTQAQDEEKLVLKNKSPRWHEQLQCWCLNFRGRVTVASVKNFQLVASDENGAAGQEHDKVILQFGKIGKDLFTMDYRYPISAFQSFAICLSSFDT…	Theoretical pI: 9.34	Molecular weight (average): 44629.12
TaTLP11	MSFRSIVHDVRDGFGSLSRRGFEVRFLGHRRGKSHSAVHELHDPAPVIQSSCWANLPPELLHDVIERLEASEATWPSRKHVVACAAVCRTWREMCQEIVKNPEFCGKITFPVSLKQPGPRDGTIQCFIKRDKSTQTYYLYLCLTSAVVAENGKFLLLAKRHSRPTCTEYTIFMNTDNTSRSSNMYIGKLRSNLLGTKFVIYDTQHPCNIPNVSQSGKTSRRFYSRKVSPKASSSTYSIAQVSYELNVLGTRGPRRMNCVMNSIPASSLEAGGTVLCQPDSAVAHSLDESFGSISFSKSSIRDRSIRFSSTRFSGISIGGSRNGGQALGDNDECKEWPLTLRNKAPRWHDQLQCWCLNFKGRVTVASVKNFQLVAATESTAEAPTPSQPAPPPPSEHDKV…	Theoretical pI: 9.28	Molecular weight (average): 48904.70
TaTLP12	MSFRSIVRDVRDGFGSLSRRGFDVRFLGHRRGKSHSAVHELHDPAPVIQSSCWANLPPELLHDVIERLEASEATWPSRKHVVACAAVCRTWREMCQEIVKNPEFCGKITFPVSLKQPGPRDGTIQCFIKRDKSTQTYYLHLCLTSAVVAENGKFLLLAKRHSRPTCTEYTIFMNTDNTSRSSNMYIGKLRSNLLGTKFVIYDTQHPCNIPNVSQSGKTSCRFYSRKVSPKASSSTYSIAQVSYELNVLGTRGPRRMNCVMNSIPASSLEAGGTVLCQPDSAVAHSLDESFGSISFLKSSIRDRSIRFSSTRFSGISIGGSRNGGQALGDNDECKEWPLTLRNKAPRWHDQLQCWCLNFKGRVTVASVKNFQLVAATESTAEAPTPSQPAPPPPSEHDKV…	Theoretical pI: 9.25	Molecular weight (average): 48856.72
TaTLP13	MSFRSIVRDVRDSFGSLSRRGFDIRILGHGRGRSHGAVHELHDPVPVIQSSCWANLPSELLRDVIERLEASEATWPCRKNVVACAAVCRTWREMCKEIVKNPEFCGKITFPVSLKQPGPRDGTMQCFIKRDRSTQTYYLYLCLTSAVLVENGKFLLSAKRICRATCTEYIISMNANSISRSTDTYIGKMRSNFLGTKFVMYDTQPPYNASSVSHSGTTSRRFYSKKGSTKVPCSTYSIAQVSYELNVLGTRGPRRMRCVMHSIPASSLEAGGSVPCQPDIIFSRSLDESFSSMPVSKSSVMDHSMRFSSARFSDVSIGGGPAIRGQALSDGEDSKDTPLILRNKVPRWHEQLQCWCLNFRGRVTVASVKNFQLTAAVQPAAGAPTPPHPAPAPPPEHDK…	Theoretical pI: 9.39	Molecular weight (average): 48833.02
TaTLP14	MSFRSIVRDVRDSFGSLSRRGFDIRILGNGRGRSHGAVHELHDPVPVIQSSCWANLPSELLRDVIERLEASEATWPCRKNVVACAAVCRTWREMCKEIVKNPEFCGKITFPVSLKQPGPRDGTMQCFIKRDRSTQTYYLYLCLTSAVLVENGKFLLSAKRICRATCTEYIISMNANSISRSTDTYIGKMRSNFLGTKFVMYDTQPPYNASSVSHSGTTSRRFYSKKGSTKVPCSTYSIAQVSYELNVLGTRGPRRMRCVMHSIPASSLEAGGSVPCQPDIIFSRSLDESFSSMPVSKSSVMDHSMRFSSARFSDVSIGGGPAIRGQALSDGDDLKDTPLILRNKVPRWHEQLQCWCLNFRGRVTVASVKNFQLTAAAQPAAGAPTPPHPAPAPPPEHDK…	Theoretical pI: 9.39	Molecular weight (average): 48793.98
TaTLP15	MSFRSLIQDMKDEFGNISRHGLRSSRSHRTAAGPGAPRVVSVGLADALEGTCWAQLPPELLREVLVRIDDSQGCWPSRRDVVACAGVCRAWRGIMKEVVRVPEASAKLTFPISLKQPGPKDGTLKCFIRRNRTTQTYYLYIGLTEALADDGKFLLAARKCRKPTYTDYLIYLDMGDMSKGSSTYIGKLRSNFLGTKFTVYDAHPPYDGAVVSKSRSARVIGLNQVSPRVPAGNYPVSHISYELNVLGSRGPRRMNCVMSSIPASAVEEGGKAPTQTEFPLGNLDSFPSIPFFRSKSARIDSAPAQAQDKEKLVLKSKSPRWHEQLQCWCLNFRGRVTVASVKNFQLVASDENGAAGQEHDKVILQFGKIGKDLFTMDYRYPISAFQSFAICLSSFDTKI…	Theoretical pI: 9.43	Molecular weight (average): 44497.04
TaTLP16	MSFRSLIQDMKDEFGNISRHGLRSSRSHRAAVAAGAPRVASVVLGLADALEGTCWAQLPPELLREVLVRIEDSQGCWPSRRDVVACAGVCRAWRGIMKEVVRVPEASAKLTFPISLKQPGPKDGTLKCFIRRNRTTQTYYLYIGLTEALADDGKFLLAARKCRKPTYTDYLIYLDMGDMSKGSSTYIGKLRSNFLGTKFTVYDAHPPYDGAIVSKSRSARVIGLNQVSPRVPAGNYPVSHISYELNVLGSRGPRRMNCVMSSIPASAVEEGGKAPTQTEFPLGNLDSFPSIPFFRSKSARIDSAPAQAQDEEKLVLKNKSPRWHEQLQCWCLNFRGRVTVASVKNFQLVASDENGAAGQEHDMVILQFGKIGKDLFTMDYRYPISAFQSFAICLSSFDT…	Theoretical pI: 9.29	Molecular weight (average): 44726.34
TaTLP17	MSFRSIVRDVRDGFGSLSRRGFEVRFLGHRRGKSHSAVHELHDPAPVIQSSCWANLPPELLHDVIERLEASEATWPSRKHVVACAAVCRTWREMCQEIVKNPEFCGKITFPVSLKQPGPRDGTIQCFIKRDKSTQTYYLYLCLTSAVVAENGKFLLLAKRHSRPTCTEYTIFMNTDNTSRSSNMYIGKLRSNLLGTKFVIYDTQHPCNIPNVSQSGKTSRRFYSRKVSPKASPSTYSIAQVSYELNVLGTRGPRRMNCVMNSIPASSLVAGGTVLCQPDSAVAHSLDESFGSISFSKSSIRDRSIRFSSTRFSGISIGGSRNGGQALGDNDECKEWPLTLRNKAPRWHDQLQCWCLNFKGRVTVASVKNFQLVAATESTAEAPTPSQPAPPPPSEHDKV…	Theoretical pI: 9.34	Molecular weight (average): 48889.73
TaTLP18	MTLRSIVRDLRESFGNLSRRNFEAKISSVPSLSGHHRGKSLESASDLQDSLVTNLQGNWASLPPELLRDVMKRLEEDDSNWPSRKDVVACASVCTTWREMCKDIVRNPEFCGKLTFPVSLKQPGSRDGLIQCFIKRDKSKLTYRLYLSLTSAVLDDNGKFLLSAKRSRRTTYTDYAISMDPKNISRSSSGYIGKLRSNFLGTKFIIYDTQPPYNASKLCPQERTSRRFSSRKVSPKVPAATGSYPIAQVNYELNVLGTRGPRRMQCTMNSIPTSAVDPDGVVPGQPKELLPRLFEESFRTTASSRYSTDFSSCRFSEFGGGPLREEGGDENAGDKESPLVLKNKSPRWHEQLQCWCLNFRGRVTVASVKNFQLIAAPAPPPPASGGEAAPEPSSQTQPP…	Theoretical pI: 9.28	Molecular weight (average): 51871.62
TaTLP19	MTLRSIVRDLRESFGNLSRRNFEAKISSVPSLSGHHRGKSLESASDLQDSLVTNLQGNWASLPPELLRDVMKRLEEDDSNWPSRKDVVACASVCTTWREMCKDIVRNPEFCGKLTFPVSLKQPGSRDGLIQCFIKRDKSKLTYRLYLSLTSAVLDDNGKFLLSAKRSRRTTYTDYAISMDPKNISRSSSGYIGKLRSNFLGTKFIIYDTQPPYNASKLCPQERTSRRFSSRKVSPKVPAATGSYPIAQVNYELNVLGTRGPRRMQCTMNSIPTSAVDPDGVVPGQPKELLPRLFEESFRTTASSRYSTDFSSCRFSEFGGGPLREEGGDENAGDKESPLVLKNKSPRWHEQLQCWCLNFRGRVTVASVKNFQLIAAPAPPPPASGGEAAPEPSLQPQPP…	Theoretical pI: 9.28	Molecular weight (average): 52097.90
TaTLP20	MSFRSIVRDVRDSFGSLSRRGFDIRILGHGRGRSHGAVHELHDPVPVIQSSCWANLPSELLRDVIERLEASEATWPCRKNVVACAAVCRTWREMCKEIVKNPEFCGKITFPVSLKQPGPRDGTMQCFIKRDRSTQTYYLYLCLTSAVLVENGKFLLSAKRICRATCTEYIISMNANSISRSTDTYIGKMRSNFLGTKFVMYDTQPPYNASSVSHSGTTSRRFYSKKGLTKVPCSTYSIAQVSYELNVLGTRGPRRMRCVMHSIPASSLEAGGSVPCQPDIIFSRSLDESFSSMPVSKSSVMDHSMRFSSARFSDVSIGGGPAIRGQALSDGDDSKDTPLILRNKVPRWHEQLQCWCLNFRGRVTVASVKNFQLTAAAQPAAGAPTPPHPAPAPPPEHDK…	Theoretical pI: 9.39	Molecular weight (average): 48817.02
TaTLP21	MTLRSIVRDLRESFGNLSRRNFEAKISSVPSLSGHHRGKSLESASDLQDSLVTNLQGNWASLPPELLRDVMKRLEEDDSNWPSRKDVVACASVCTTWRDMCKDIVRNPEFCGKLTFPVSLKQPGSRDGLIQCFIKRDKSKLTYRLYLSLTSAVLDDNGKFLLSAKRSRRTTYTDYAISMDPKNISRSSSGYIGKLRSNFLGTKFIIYDTQPSYNASKLCPQERTSRRFSSRKVSPKVPAATGSYPIAQVNYELNVLGTRGPRRMQCTMNSIPTSAVDPDGVVPGQPKELLPRLFEESFRTTASSRYSTDFSSCHFSEFGGGPLREEGGDENAGDKESPLVLKNKSPRWHEQLQCWCLNFRGRVTVASVKNFQLIAAPAPPPPASGGEAAPEPSSQTQPP…	Theoretical pI: 9.22	Molecular weight (average): 52073.74
TaTLP22	MSLKSIVRELKEMRDGIGSMSRRGGVSDGRAGHGRGGSRHSWPSLWPEPQPQPQRQGQEPQQQGQWANLPPELLIDVIQRVEASEVAWPARRHVVACAAVCRSWREVTKDVVKTLEECSRITFPISLKQPGPRDSPVQCFVRRDRATSTYLLYLGLSPSLHGENDKLLLAARKIRRAARTSFVISLISDDFSHSSSTYVGKLKPNFLGTKFTIFDSQPPCDAAVLPNNKPSKRHSKQVSPRLPLGNYNVATVSYELTVLRNRGPRRMQCTMHSIPAACIQEGGKAPTPTGMVHSLDEQVSTLSTSKGKEPNMEFSSTSLSADLSGPISTSEAPLLLKNKAPRWHEQLQCWCLNFRGRVTVASVKNFQLVASVDPSLGVPAAEQEKVILQFGKIGKDIFT…	Theoretical pI: 9.52	Molecular weight (average): 47138.97
TaTLP23	MSLKSIVRELKEMRDGIGSMSRRGGVTDGRAGHGHGRGGSRHSWPSLWPEPQPQPPRPGQEPQQQGQWANLPPELLIDVIQRVEASEVAWPARRHVVACAAVCRSWREVTKDVVKTLEECSRITFPISLKQPGPRDSPVQCFVRRDRATSTYLLYLGLSPSLHGENDKLLLAARKIRRAARTSFVISLISDDFSHSSSTYVGKLKPNFLGTKFTIFDSQPPCDAAVLPNNKPSKRHSKQVSPRLPLGNYNVATVSYELTVLRNRGPRRMQCTMHSIPAVCIQEGGKAPTPTGMVHSLDEQVSTLSTSGKGKVPNIEFSSTSLSADLSGPISTSEAPLLLKNKAPRWHEQLQCWCLNFRGRVTVASVKNFQLVASVDPSLGVPAAEQEKVILQFGKIGKD…	Theoretical pI: 9.58	Molecular weight (average): 47322.26
TaTLP24	MSLKSIVRELKEMRDGIGSMSRRGGVSDGRAGHGRGGSRHSWPSLWPEPQPQRPGQEPQQQGQWANLPPELLIDVIQRVEASEVAWPARRHVVACAAVCRSWREVTKDVVKTLEECSRITFPISLKQPGPRDCPVQCFVRRDRATSTYLLYLGLSPSLHGENDKLLLAARKIRRAARTSFVISLISDDFSHSSSTYVGKLKPNFLGTKFTIFDSQPPCDAAVLPNNKPSKRHSKQVSPRLPLGNYNVATVSYELTVLRNRGPRRMQCTMHSIPAVCIQEGGKAPTPTGMVHSLDEQVSTLSTSSKGKEPNIEFLSTSLSADLSGPISTSEAPLLLKNKAPRWHEQLQCWCLNFRGRVTVASVKNFQLVASVDPSLGVPAAEQEKVILQFGKIGKDIFTM…	Theoretical pI: 9.48	Molecular weight (average): 47021.95
TaTLP25	MSFRSMVREMKGEVDAIARRRPLPSARGVRRVAAVATEEEAARQGCCWAELPPELLREVLARVEASEPRWPRRRDVVACAGVCRTWRGVVREIVRVPEVSGRLTFPISLKQPGPRDAPIKCFIRRHRATQTYFLYIGLTDALADTGKFLLAARKYHRPTCTEYLISLDKTDMSKGSQTCVGKLRSNFLRTKFTVYDAHPPHAGPVVSKRWPAGDYPVIQINYEVNVLGSRGPRRMNCIMESIPVSAIEQGGTAPTQTAFPFFNPKSSRMDSSITPLSSQVESKLVLKNKSPRWHEHLRCWCLNFHGRVTVASVKNFQLVASDESAPANEENDDTTLQFGKIGKDLFTLDYRYPVSAFQAFAICLSSFDTKLARE:	Theoretical pI: 9.62	Molecular weight (average): 42107.44
TaTLP26	MSFRSMVREMKGEVDAIARRRPLPPSARGVRRVAAVASVALPEEAARQGWCWAELPPELLREVLARVEASEPRWPRRRDVVACAGVCRTWRGVVREIVRVPEVSGRLTFPISLKQPGPRDAPIKCFIRRHRATQTYFLYIGLTDALADSGKFLLAARKYHRPTCTEYLISLDKTDMSKGSQTCVGKLRSNFLRTKFTVYDAHPPHAGPVVPKRWPAGDYPVIQINYEVNVLGSRGPRRMNCIMDSIPVSAIEQGGTAPTQTAFPFFNPKSSRMDSSITPLSSQVESKLVLKNKSPRWHEHLRCWCLNFHGRVTVASVKNFQLVASDESAPANEENDDTTLQFGKIGKDLFTLDYRYPVSAFQAFAICLSSFDTKLARE:	Theoretical pI: 9.73	Molecular weight (average): 42506.96
TaTLP27	MPFRSMVREMRGEVDAIARRRPLPSSARGVRRVAAVAPPGEEAARQGCCWAELPPELLREVLARVEASEPRWPRRRDVVACAGVCRTWRGVVREIVRVPEVSGRLTFPISLKQPGPRDAPIKCFIRRHRATQTYFLYIGLTDSLADAGKFLLAARKYHRPTCTEYLISLDKTDMSKGSQTCVGKLRSNFLRTKFTVYDAHPPHAGPVVPKRWPAGDYPVIQINYEVNVLGSRGPRRMNCIMDSIPVSAIEHGGTAPTQTAFPFFNPKSSRMDSSITPLSSQVESKLVLKNKSPRWHEHLRCWCLNFHGRVTVASVKNFQLVASDESAPANEENDDTTLQFGKIGKDLFTLDYRYPVSAFQAFAICLSSFDTKLARE:	Theoretical pI: 9.70	Molecular weight (average): 42244.63
TaTLP28	MPREEPPAAEVSETGEKEDGQPEEQEERWARLLPELLSEVVRRVEASGGERWPARKDVVSCACVCRRWRDAAVAVVRPPAVSGKITFPSSLKQPGPREFPMQCFIKRNKKNSTFYLYLGLTTATVDKGKFLMAARRFRRGPHTEYIISLDADDLSQGSNAYMGKLRSDFWGTNFKVYDSKPPHDGAKASSSRSSRRFGSRRISPQVSAGNYEVGQLSYKYNLLKSRGPRRMYCALECPSPQETWENSLKTKFRKPMGTTVLRNKAPRWHEHLQCWCLNFHGRVTVASVKNFQLSVAADPNDPTGSRDEETVLLQFGKVDDDIFTMDYRQPLSAFQAFAISLSSFGTKLACE:	Theoretical pI: 9.34	Molecular weight (average): 39707.06
TaTLP29	MPREEPPAAEVSEVAETGEEKEDGQPEEQEERWARLLPELLSEVVRRVEASGGERWPARKDVVSCACVCRRWRDAAVAVVRPPAVSGKITFPSSLKQPGPREFPMQCFIKRNKKNSTFYLYLGLTTATVDKGKFLMAARRFRRGPHTEYIISLDADDLSQGSNAYMGKLRSDFWGTNFKVYDSKPPHDGAKASSSRSSRRFGSRRISPQVSAGNYEVGQLSYKYNLLKSRGPRRMYCALECPSPQETWENSLKTKFRKPMGTTVLRNKAPRWHEHLQCWCLNFHGRVTVASVKNFQLSVAADPNDPTGSRDEETVLLQFGKVDDDIFTMDYRQPLSAFQAFAISLSSFGTKLACE:	Theoretical pI: 9.20	Molecular weight (average): 40135.50
TaTLP30	MPREEPAAAEVSEVAEMGEEKEDGQPEEQEERWARLLPELLAEVVRRVEASGGERWPARKDVVSCACVCRRWRDAAVAVVRPPAVSGKITFPSSLKQPGPREFPMQCFIKRNKKNSTFYLYLGLTTATVDKGKFLMAARRFRRGPHTEYIISLDADDLSQGSNAYMGKLRSDFWGTNFKVYDSKPPHDGAKASSSRSSRRFGSRRISPQVSAGNYEVGQLSYKYNLLKSRGPRRMYCALECASPQETWENALKTKFRKPMGTTVLRNKAPRWHEHLQCWCLNFHGRVTVASVKNFQLSVAADPNDPAGSRDEETVLLQFGKVDDDIFTMDYRQPLSAFQAFAISLSSFGTKLACE:	Theoretical pI: 9.20	Molecular weight (average): 40051.49
TaTLP31	MALWRRSSSWLTSCSRAPAGIGGGNEAKVSPEVAPEDAAEQIHEEAEDEERWSRLLPELLTDIVRRVDAGAERWPPRRDVVACACVCRRWRDAAVAVVRPPLECGRITFPSSLKQPGPRDAPMHCFIRRNKSTSTFYLYLSLTQALTDKGKFLLAARRFRHGAHTEYIISYDSDDLYPGSNSGVGKLRSDFLGTKFVMYDNQKPYDGAKSLKSRSSRRFASKQISPHVSGDNLEVGQVSYRFNFLKSRGPRRMHCSIQCPVGQGTASDPSKEKPPSTSSSLSLKNKAPRWHDHLQCWCLNFHGRVTVASVKNFQLVAPAGTSDPWGVGDEETVILQFGKIEDDAFTMDFRHPLSAYQAFAICLTSFGTKLACE:	Theoretical pI: 9.04	Molecular weight (average): 41606.13
TaTLP32	MALWRRSSSWLTSCSRAPAGIGGGNEAKVSPEVAPEEAREEDRRAEAEDEERWSRLLPELLTDIVRRVDAGAERWPPRRDVVACACVCRRWRDAAVSVVRPPLECGRITFPSSLKQPGPRDAPMHCFIRRNKSTSTFYLYLSLTQALTDKGKFLLAARRFRHGAHTEYIISYDSDDLYPGSNSGVGKLRSDFLGTKFLMYDNQKPYDGAKSLKSRSSRRFASKQISPLSGDNLEVGQVSYRFNFLKSRGPRRMHCSIQCPVGQGTASDPSKEKPPSTSSSLSLKNKAPRWHDHLQCWCLNFHGRVTVASVKNFQLVAPAGTSDPWGVGDEETVILQFGKIEDDAFTMDFRHPLSAYQAFAICLTSFGTKLACE:	Theoretical pI: 9.18	Molecular weight (average): 41732.29
TaTLP33	MALWRRSSSWLTSCSRAPAGIGGGNEAKVSPEVAPEDAAAEHEGRRAEAGDEERWSRLLPELLTDIVRRVDAGAERWPPRRDVVACACVCRRWRDAAVAVVRPPLECGRITFPSSLKQPGPRDAPMHCFIRRNKSTSTFYLYLSLTQALTDKGKFLLAARRFRHGAHTEYIISYDSDDLYPGSNSGVGKLRSDFLGTKFVMYDNQKPYDGAKSLKSRSSRRFATKQISPHVSGDNLEVGQVSYRFNFLKSRGPRRMHCSIQCPVGQGTASDPSKEKPPSTSSSLSLKNKAPRWHDHLQCWCLNFHGRVTVASVKNFQLVAPADTSDPWGVGDEETVILQFGKIEDDAFTMDFRHPLSAYQAFAICLTSFGTKLACE:	Theoretical pI: 9.18	Molecular weight (average): 41876.43
TaTLP34	MAATPPKREPLAPLSCNAAADTPAAAARPRAPAVSAEKENLGAANLGPGKEEKRATPAAAKAAPLRPSSLQARMEGEEAPLATATAAGLPVFVGPRRRELLPPPPPPASSSYEAWDLSDNEAAPAASWATLPNRALLCRPLPLDVGRCTCVVVREKATGARGVALYSLYTNEGQGRQDRKLAVARHRRRRGRSEFIVAQNQDGVFCSSDKNFLGTMGANLVGSKYQIWGQGNRVDELKSQSKRLLGVIAFAPTITTLTGSFRSMRAWIPKNQSMQLRTNSSAQIQHVSGLPKDWQEKRSRADQLCSRSPFYNNMTKRYELDFRERVGRMGYKVQTSVKNFQMTLEENGRQTILQLGRVGKSKYIMDFRYPLTGYQAFCICLASMDSKLCCTL:	Theoretical pI: 9.93	Molecular weight (average): 42962.22
TaTLP35	MAATPPKREPLAPLSCNAAANTPAAATRPRAPAVSAEKENLGAANLGPGKEEKRATAPAAAKAAPLKPSSLQARMEGEEAAGLPVFVGPRGRELLPPAPPAPASSSYEAWDLSDNEAAPAASWATLPNRALLCRPLPLDVGRCTCVVVREKATGARGVALYSLYTNEGQGRQDRKLAVARHRRRRGRSEFIVAQNQDGVFCSSDKNFLGTMGANLVGSKYQIWGQGNRVDELKSQSKRLLGVIAFAPTITTLTGSFRSMRAWIPKNQSMQLRTNSSAQIQHVSGLPKDWQEKRNRAEQLCSRSPFYNNMTKRYELDFRERVGRMGYKVQTSVKNFQMTLEVKFLLQLSMGLDQTEQHIMISTTCARQENGRQTILQLGRVGKSKYIMDFR:	Theoretical pI: 10.10	Molecular weight (average): 42843.02
TaTLP36	MAATPPKREPLAPLSCNAAADTPAATAGARPRAPAVSAEKENLGTANLGPGKEEKRATTPAAAKAAPLKPSSLQARMEGEEAPSATATATAAGLPVFVGPRGRELLPPPPPPASSSYEAWDLSDNEAAPAASWATLPNRALLCRPLPIDVGRCTCVVVREKATGARGVALYSLYTNEGQGRQDRKLAVARHRRRRGRSEFIVAQNQDGVFCSSDKNFLGTMGANLVGSKYQIWGQGDRVDELKSQSKRLLGVIAFAPTITTLTGSFRSMRAWIPKNQSMQLRTNSSAQIQHVSGLPKDWQEKRSRAEQLCSRSPFYNNMTKRYELDFRERVGRMGYKVQTSVKNFQMTLEVKFLLLLSMGLDQTEQHIMISTTCARQENGRQTILQLGRVGKSKYIMDF…	Theoretical pI: 9.99	Molecular weight (average): 43717.96
SiTLP1	MSFRSIVRDVRDGFGSLSRRSFEVTIAGLSGLTGHHRGKSQSTVHELRDTDLIIQESRWANLPPELLRDVIRRLEASESTWPNRKNVVSCAAVCRTWREMCREIVLSPEFCGKLTFPVSLKQPGHRDGMIQCFIKRDKSKSTYHLYLCLSTAVLTENGKFLLSAKRNRKTTCTEYVISMDADNISRSSSTYIGKLRSNFLGTKFMIYDTQPPYNGAVVPHAGRTSRRFNSKKVSPKVPTGSYNIAQVTYELNVLGTRGPRRMHCVMHSIPASAVEPGGIVPGQPEQILPRALEESFRSTTSFSKSSIMDRSMDFSSSRDFGSVRDFSSARFSDIARGAMVGDEEEQNKERPLVLRNKAPRWHEQLQCWCLNFRGRVTIASVKNFQLIATSSQPPATGAP…	Theoretical pI: 9.59	Molecular weight (average): 50681.87
SiTLP2	MSFRSLIQDMRDEFGSISRHTLRSRSHRSAGNASRAAVAEPSEAMDQSCWAQLPPELLREVLVRIEASESWWPARKDVVSCAGVCRTWRGIMKEAVCVPEVSGKLTFPISLKQPGPRDGTLKCFIRRNRTTQTYYLYIGLTEALADDGKFLLAARKCRKPTCTDYLISLDKVDMSKGSSTYIGKLRSNFLGTKFTVYDAHPPYDGAVVSKSRSARVVGLNQVSPRIPAGNYPVSHISYELNVLGSRGPRRMNCVMDSIPASAVEEGGKAPTQTEFPLSSLDSFPSIPFFRSKSARIDTTSQSSTQKEDRLVLKNKSPRWHEQLQCWCLNFRGRVTVASVKNFQLVASEDNGSGNQENDKVILQFGKIGKDLFTMDYRYPISAFQAFAICLSSFDTKIAC…	Theoretical pI: 9.32	Molecular weight (average): 44617.93
SiTLP3	MSFRSIVRDVRDGLGSLSRRGFEVKLLGHRRGKSHGAVHELHDPAPVIQSSCWANLPPELLRDVIERLEASEATWPNRKNVVSCAAVCRTWREMCKEIVKNPEFSGKITFPVSLKQPGPRDATIQCFIKRDKSTQTYYLYLCLSTAVLVESGKFLLCAKRTSRPTCTEYTIFMNSENISRSSKMYIGKLRSNLLGTKFAIYDTQPPCNAAQPGKTSRRFYSRKVSPKVSSSTYNIAQVSYELNVLGTRGPRRMNCVMHSIPASSLEAGGTVPCQPDSVLTRPLDESFGSISFSKSSVMDHSMRFSSTRFSEVSMGSHRIGDMALGDNDECNERPLILRNKAPRWHEQLQCWCLNFRGRVTVASVKNFQLVAATQPSAGAPTPSQAAPAPPPEHEKVILQ…	Theoretical pI: 9.42	Molecular weight (average): 48647.86
SiTLP4	MSFRSIVRDVKESFGSLSRRSFEVRISGLPGLGHHRGKSVGSLSNLHDRPIVVDQSRWVGLPPELLRDVMKRLEEGESTWPSRKDVVACAAVCGTWREICKDIVPSPEFCGKLTFPVSLKQPGPRDEMIQCFVKRDKSTSTYYLYLCLSPAVLSENGKFLLAAKRNRRTTYTEYIISMDPKNISRSSNGYVGKMRSNFLGTKFVVYDTQPPYNAGSLVSCGRSSRRISSRRVSPKVPTASYPIAQVNYELNVLGTRGPRRMNCTMHSIPASAMEPEGMVPCQPKQLFLPASSSYEESFRSANTSSSSRFSVTDRSLDFSSSRFSEVSGVIQQNEDDGQAKERPLVLRNKEPRWHEQLQCWCLNFRGRVTVASVKNFQLIAAPQLDAVPSESSQQAQPSS…	Theoretical pI: 9.37	Molecular weight (average): 50253.21
SiTLP5	MSFRSIVRDVRDGFGSLSRRGFEVRLLGHRRGKSHGAVHELQDPVPVVQSSCWASLPPELLRDVIERLEASEDTWPSRKNVVVCAAVCRTWREMCREIVKSPEFSGKITFPVSLKQPGPRDGTIQCFIKRDKSTQIYYLYLCLSSTVLVENGKFLLSAKRNIRPTCTEYIISMNSGNVSRSTNTNTYIGKLRSNFLGTKFVIYDTQPPYNAASATQSGKTSQRFYSKKASTKVSRSRYSIAQVSYELNVLGTRGPRRMNCVMHSIPASCLEAGGSVPCQPDSIVAHSLGGSFSSVSLSKSSVMDHSMHFSSARFSDVATGLGLGSEGRALFDDEECNDRPLILRNKAPRWHEQLQCWCLNFRGRVTVASVKNFQLVAATQPAAGAPTPSQPAPAPALDQ…	Theoretical pI: 9.42	Molecular weight (average): 48933.95
SiTLP6	MSFRSMVRDLRESFGNISRRNFEVRIHHRGKSLGSSSDLQDRPVVIQQSRWASLPPELLRDVMKRLEEDESSWPSRKDVVSCASVCTTWRDMCKDIVRSPEICAKLTFPVSLKQPGPRDGVIQCFIKRDKSKLTYRLYLCLSSAVLDENGKFLLAAKRSRRTTHTDYAISMDSKNFSRSSTGYIGKLRSNFLGTKFIIYDTQPPYNAGRLCSQERAPSRRFSSRKVSPKVPIGSYPIAQVNYELNVLGTRGPRRMQCTMQSIPESAVEPGGVVPGQPKELLPRLFDESFRSTATSLSKYSIADSSMDLSSCRYSEFGGGNQQGDDNDADKERPLVLRNKAPRWHEQLQCWCLNFRGRVTVASVKNFQLIACVAQAAAARASAPPGQTQPQASSSHDTVI…	Theoretical pI: 9.54	Molecular weight (average): 49242.17
SiTLP7	MSFRSIVRDVRDGFGSLSRRSFEVTLASIYGLTGHHKGKTQSSSHELDDSPSIIRESRWASLPPELIRDIIRRLEADESTWPARKHVVCFAAVCRTWREMCKEIVLSPEFCGKLTFPVSLKQPGPREGNTMIQCFIKRNKSKSTYQLYLCLSNVVTSESGKFLLSARRHRKTTCTEYTISMDSGNTSRSSRTYIGKIRSNFLGTKFLIYDTQPPYNGAVVPPVGRTSRRFNSTKVSPKLPSVSYNIAQVSYELNVLGTRGPRRMRCSMHSIPASSVEPGGIVPGQPEQIVPRALEDSFRSTASFSQSFRSTTSLSKSIMDSSMDFNSARFSDIAGSGSSARFSGIGSSARISGIGSSARISGIASGRLDHDEDSEVKERPLVLRNKPPRWHEQLQCWCL…	Theoretical pI: 9.78	Molecular weight (average): 53178.57
SiTLP8	MSLKSIVGQLKEMRDGIGSMSRRAGASDGRAGHGRAGSRHSWPGLWSEQPQPQRHGHGQEGSQQQHQGRWANLPPELLLDVIQRVEASEATWPARRQVVLCAHVCRSWREVTKEVVKTLEECGRITFPISLKQPGPREQPVQCFVKRDRATSTYLLYLGLSPSLNVENDKLLLAARKVRRATRTSFVISLASNDFSHSSSTYVGKLKPNFLGTKFTIFDSQPPSDAVVLPNNKPSKRQSKQVSPRLPLGNYNVATVTYELTVLRNRGPRRMQCTMHSIPAQCIQEGGKCPTPTGTIHSLDEPSTLPSTKGKEPAVEFSSTSLSADLSGPACTSEAPLVLKNKAPRWHEQLQCWCLNFRGRVTVASVKNFQLVASVDPSLNVPAAEQEKVILQFGKIGKD…	Theoretical pI: 9.57	Molecular weight (average): 47461.24
SiTLP9	MPFSSMIQEMKGEIGAISRRGLLRSRSQSTGRVQRVEPDEAAMRESSWAQVPPELLRVVLAKVEAGEARWPGRGAVVACAGVCRGWRGTVKEIVPVPEASGKLTFPISLKQPGPRDAPVKCFIRRNRATQSYFLCLGVTDALVDDGKFLLAARKYRRPSCTEYLISLDSKGNGTYLGKLRSNFLGTKFTVYDAHPPCAGAVVSKGPSAHMIGSAQVSPMKGGPPAGNYPVSHISYEVNVLGSRGPRKMNCVMDSIPASAIKEGGTAPTQTEFPSSNSSSFASVPFFRSKSGQLDSSGAQNESKVALKNKSPSWHQQLQCWCLNFHGRVTVASVKNFQLVASGESAPTPSNQEDDDVILQFGKVGKDLFTMDYRYPISAFQAFAICLSSFDTKIGCE:	Theoretical pI: 9.38	Molecular weight (average): 42812.91
SiTLP10	MAPGVVVGSGGLGGRGARAGTSRSGRWLVCRAWGADEGERGGPRRGDLSIQLQSPFFSSAGRALFDAAVLGSLTPKLSSPRRLVATAVRWLDWGVVSSPHYKGHRRGVMYSFFFLDSRLVFSVNSFSSFLPCSLARFSSLLRSPLYSSPAPLAPIDLLPHLVSKLLDASGGRKSAPGRPTMVSWRRSASWLSSASRSSLGGAVGGEAKVTPEVGPAAQEEEEVDEERWSRLLPELLTEIVRRVDAGAERWPLRRDVVVCACVCRRWRDAAFSVVRPPLEGGRITFPSSLKQPGPRDAPMHCFIRRDKKNSTFSLYLSLTQALTDKGKFLLAARRFRQGAHTEYIISYDYDDLHPGSTSYVGKLRSDFLGTKFIIYDSQAPYNGAKPSRSRSSRRFTSKQ…	Theoretical pI: 9.78	Molecular weight (average): 60204.58
SiTLP11	MPRQASTLPAPPPERGEMAEVVEADPDAEDQEERWARLLPELLSDVVRRVETSGAERWPARKDVVSCACVCRRWREAAVAVVRPPAESGKITFPSSLKQPGPRELPMQCFIKRNKRNSTFLLYLGYANSPMDKGKFLMAARRFRRGPHTEYIISLDAEDLSQGSNAYMGKLRSDFWGTNFKVYDSKPPYDGAKASSSRSSRRFGSRRISPQVSAGNYEVGQVSYKYNLLKSRGPRRMYCALECPSAQETWENSLKTKFRKPMGPTALRNKAPRWHEHLQCWCLNFHGRVTVASVKNFQLVAAANPSDPAGTVDEETVLLQFGKVDDDMFTMDYRQPLSAFQAFAISLSSFGTKLACE:	Theoretical pI: 9.35	Molecular weight (average): 40235.81
SiTLP12	MAAASLVSRGVQVRREGVAAAEEEDRWARLLPELVAEVVRRVEASGGERWPARKDVVSCASVCRRWRDVAVTVLRPLPESGKITFPASLKQPGPKDFPIQCFINRNKKNSTFYLYLGFTNNLTSTTGKGKFLMAAKRVRRGAHTEYIISLDADDLSQGNSAYVGKLRSDFWGTNFKIYDSQPPYDGAKASSTRSIRCFGSRRISPQVLSGNFDVGQVSYKYNLLKSRGPRRMCCTMECPSVQETWENSLEVKSLRRTGTTVLRNKAPRWHEHLQCWCLNFHGRVTVASVKNFQLVATADPTHPDSAGDDETVLLQFGKVDTDIFTMDYWRPLSAFQAFAICLSSFGTKLACE:	Theoretical pI: 9.43	Molecular weight (average): 39455.99
SiTLP13	MPPWRRASASPGPSAAAAASSSEPARPLAGGNARVSPEVPAEHEGGVEDGRWSALVPELLADILRRVDAGAERWPGRRDVVACACVCRRWREAAVAMVRPPLQCGGITFLASLKQPGPRDAPMQCFIKRNKKKSTFHLYLSLTQALTGQGKFLLAARRNRCGFRMEYIISTQGDLSHGSHVGKLKSNFTRTKFTVYDWQPQYEGAKVSSSRCRRWLASKQINPLASSGIVDIGEVSYEYNLLKSRGPRRIHCSIQCPADEGTAIDPEEANQPSSPSSLVLYNKLPRWHEHLQCWCLNFHGRVMVASVKNFQLIAPAGTGEPWGVQDDETVILQFGKVEDDVFTMDYRQPLSAFQAFAICLTSFGSKLACE:	Theoretical pI: 9.10	Molecular weight (average): 40832.63
SiTLP14	MATATTTTTPNPKREPLRPRSSNAPAAPSPATARRGLASAEKENLGPKSLGNGKEQKEKAATAATAAAAAELSKPARPAPAVAPTPPLKSSSLQLRMKDESTEAAAAAGAPPVLVGPRGRELLPPPSSSYEAWDLSDSESAPASSWATLPNRALLCRPLPQDVGRCTCVIAREAATGARGVALYSLYTNEGQGRQDRKLAVARHRRRRGRSEFIVAQNQDGIFCTSDKNFLGTVAANLVGSKYQIRGQGNRVDELKSQSKRLLGVVAFAPTITTLTGSFRSMRAWIPKSQSMQLKANNSAQIQHISGLPKDWQEKKSRADQLCSRAPFYNHMTKRYELDFRERAGRMGYRVQTSVKNFQMTLEENGRQTVLQLGRVGKSKYIMDFRYPLTGYQAFCICL…	Theoretical pI: 10.07	Molecular weight (average): 44583.85
ZmTLP11	MSFRSLIQDMKDEFGSISRHSLRSRSHRSAGNAARAAAAGPSEAMDQSCWSQLPPELLREVLVRIEASESWWPARKNVVSGAGVCRTWRGIMKEAVRVPEVSGKLTFPISLKQPGPRDGTLKCFIRRNRTTQTYYLYIGLTEALADDGKFLLAARKCRKPTCTDYLISLDKVDMSKGSSTYIGKLRSNFLGTKFTVYDAHPPYDGAAVSKSRSARVVGLKQVSPRVPAGNYPVSHISYELNVLGSRGPRRMNCVMDSIPASAVKEGGKTPTQTEFPLSSLDSFPSFPFFRSKSARIDSSTSQSSSQREDRLVLKNKSPRWHEQLQCWCLNFRGRVTVASVKNFQLVASEDNGPENQESDKVILQFGKIGKDLFTMDYGYPISAFQAFAICLSSFDTKIA…	Theoretical pI: 9.58	Molecular weight (average): 44559.82
ZmTLP1	MSFRSIVRDVRDGFGSLSRRGFEVKFLGHRRGRSHGAVHELRDPAPVIQSSCWANLPPELLRDVIERLEASEATWPNRKSVVSCAAVCRTWREICKEIVKNPEFSGKITFPVSLKQPGPRDVTIQCFIKRDKSTQTYYLYLCLSTAVLVESGKFLLCAKRTSRPTCTEYTIFMNSENLSRSSKMYIGKLRSNLLGTKFAIYDTQPPCNAAEPGKTSRRFYSRKVSPKVSSSTYNIAQVSYELNVLGTRGPRRMNCVMHSIPTSCLEAGGTVPSQLDSILARSTDESFGSISFSKSSVVDRSMRFSSSRFSDISMSSSRRIGDTASGDNDECKERPLILRNKAPRWHEQLQCWCLNFRGRVTVASVKNFQLVAATQPAAGAPTPSQATPVPPEHEKVILQ…	Theoretical pI: 9.56	Molecular weight (average): 48766.89
ZmTLP14	MSFRSIVRDVRDGFGSLSRRSFEVTLASIYGLTGHHKGKTQSSSHVLDDSPSIIRESRWANLPPELIRDIIRRLEADESTWPARKHVVCFAAVCRTWREMCKEIVLSPEFCGKLTFPVSLKQPGPRDGNTMVQCFIKRNKSKSTYHLYLCLSNVVTSESGKFLLSAKRHRKTTCTEYTISMDSGNISRSKRTYIGKIRSNFLGTRFLIYDTQPPYNGAVVPPAGRTSRRFNSTKVSPKLPSVSYNIAQVSYELNVLGTRGPRRMRCIMHSIPASSVEPGGTVPGQPEQIVPRALEDSFRSTASFSQSFRSTASFSKSIMDSSMDFNSARFSDIAGSSARFTGVPGSSARFAGVPGSSARFSGIAGARLDNDEESETKERPLVLRNKPPRWHEQLQCWCL…	Theoretical pI: 9.85	Molecular weight (average): 53234.73
ZmTLP7	MSFRSIVRDVRDSIGSLSRRNFEVTAAAAAGGLSGRTAAQHRRGRSQSTVHELRDTRVVVQQDESRWASLPPELLRDVVRRLEASESAWPNRKHVVSCAAVCRAWREMCREIVLSPEVCGKLTFPVSLKQPGPRDGMIQCFIKRDKSKSTYRLYLCLSTAVLMENGKFLLSAKRSRRTTCTQYIISMDADNISRSSSTYIGKLRSNFLGTKFVVSDTQPPPYRYSGAAPPPPRAAGRRASRRFDSRKVSPKVPAPGGAGGGSYSIAQVTYELNVLGTRGPRRMHCVMRSIPASAVEPGGTVPGQPERILPRALLEEEQEEEEEDSSFRRTGTGTGTTSFSKSSASIMDRSVDFGGGSSSSFRDFSSARFSDIVDGGGGDGGQDRERPLVLRNKAPRWHE…	Theoretical pI: 9.81	Molecular weight (average): 54402.67
ZmTLP5	MSFRSMVRDIRESFGNISRRNFEVRIHHRGKSLGSSGDLQDRPAEVQQSRWASLPPELLCDVMKRLEEDDSSWPDRKDVVSCASVCTTWRDMCKDIVRSPEHCAKLTFPVSLKQPGPRDGVIQCFIKRDKSKLTYRLYLSLSSGVLDENGKFLLAAKRSRRMAHTEYAIFMDSRNFSRSSTGYIGKLRSNFLGTKFIIYDTQAPYNGGRVCTQERAPSRRLSSRKVSPRVPSGSYPVAQVNYELNVLGTRGPRRMQCAMHSIPASAVEPGGVVPGQPKELLPRLFDESFRSTATSSFSKYSVADSSMDLGSCPFSEVEVGGGSLREGDESEKERPLVLRNKAPRWHEQLQCWCLNFRGRVTVASVKNFQLIAPAKTQPQPQASGPPPPPPPSSSSYHDP…	Theoretical pI: 9.44	Molecular weight (average): 49331.22
ZmTLP2	MPFRSIVRDVRDGFGSLSRRGFEVRFLSHRRGKSHGAVHELHDPVLVVQSSCWASLPPELLRDVIERLETSEDTWPSRKHVVACAAVCRTWREMCREIVKSPEFSGKITFPVSLKQPGPRDGTIQCFIKRDTSTQIYSLYLSFSSAVPVENGKFLLSAKRNCRATYTEYIISINSGDTSRCTSNNTYIGKLRSNFLGTKFVIYDTHPPYNGTSQTVAGKTSQRFYSKKGSTKVSCRWYSIAQISYELNVLGTRGPRRMNCVMHSIPASCLEAGGSVPCQPDSIAAHSVGGSFSSVSLSKSSTMDHSMHFTSSRLSDAITGDGIVNRGQALNDADDEECKDMPLILRNKAPRWHEQLQCWCLNFRGRVTVASVKNFQLVAATQPAAGALTPSQAAPQPAP…	Theoretical pI: 9.08	Molecular weight (average): 49551.45
ZmTLP8	MSFRSIVRDVRESFGSLSRRSLEVRISGLPGLSGGHHRGKSVGSVSDLRDRPVVVDQSRWVGLPPELLRDVMRRLEEGESNWPSRKNVVACAAVCGTWREICKDIVLSPEFCGKLTFPVSLKQPGPRNGIIQCFIKRDKSTSTYYLYLCLSPVVLSEDGKFLLAAKRNRRTTYTEYIISVDPKSISRSSDGCVGKMRSNFLGTKFIVHDTRAPHNAGSLVSCERGSRRISSRRVSPKVPTASYPIARVNYELNLLGTRGPRRMNCTMHSIPASTLDPQGMVPEPGQPKQIFVPGSSSFEDSFRSANNTPSSSRFSVADRSLDWSSSRFSETSGLAQQDDDDSDQAKERPLVLCNKEPRWHEQLQCWCLNFHGRVTVASVKNFQLIAAPQLDSEPSQQAQ…	Theoretical pI: 9.23	Molecular weight (average): 50804.53
ZmTLP6	MSLKSIVRELKEMRDGIGSMSRRGGSGSDGRAAGHARSGSRHSWPSLWAEQQQPQRQGQGQGLGQEGPRHQHQGRWADLPPELLLDVIQRVESSEATWPARRQVVACAAVCRSWREVTKDVVKTLEECGRITFPISLKQPGPRELPVQCFVRRERATSTYLLYLGLSPSMNVENDKLLLAARKVRRATRTSFVISLVSDDFSRSSSTYVGKLKPNFLGTKFTIFDSQPPPDAVALPNNRPSKRQSKQVSPRLPLGNYNVATVTYELTVLRNRGPRRMQCTMHSIPAECIQEGGKAPTPTGTVQSLDEPVPTLPSTTKGKEVAVQFSSTSLSADLSGPVSGNEAPLVLKNKAPRWHEQLQCWCLNFRGRVTVASVKNFQLVASVDPSLNVPAAEQEKVIL…	Theoretical pI: 9.69	Molecular weight (average): 48301.17
ZmTLP9	MSLKSIVRELKEMRDGIGSMSRRGGSGSDGRAFHGRSGSRHSWPSLWAEQQQSHRQGQGLGPGPEGPHHQHQGRWANLPPELLLDVIQRVESSEATWPARRQVVACAAICRSWREVTKEVVKTLEECGRITFPISLKQPGPREMPVQCFVRRERATSTYLLYLGLSPSMNVEKDKLLLAARKVRRATRTYFVISLVSDDFSHSSSTYVGKLKPNFLGTKFTIFDSQPPPDAVVLPNNKTSKRQSKQVSPRLPLGNYNVATVTYELTVLRNRGPRRMQCTMHSIPAECIQEGGKAPTPTGAIQSLDEPVSSTLPSAKGKEVAVEFSSTSLSADLSGPACVNGTPLVLKNKAPRWHEQLQCWCLNFRGRVTVASVKNFQLVASVDPSLNIPAAEQEKVILQ…	Theoretical pI: 9.60	Molecular weight (average): 48277.31
ZmTLP4	MPRDGAQAAPPPERGEMDEVVEADPDTEAEDQEERWARLLPELLSDVVRRVEASGGERWPARKDVVSCACVCRRWREAAVSVVRPPAESGKITFPSSLKQPGPRERPMQCFIKRNKNNSTFYLYLGFTSSPVDKGKFLMAARRFRRGPHTEYIISLDAEDLSQGSNAYMGKLRSDFWGTNFKIYDSKPPYDGAKASSSRSSRRFGSRRISPQVSAGNYEVGQVSYKYNLLKSRGPRRMYCTLECPSAQETWENSLKTKFRRPLGPTTLRNKAPRWHEHLQCWCLNFHGRVTVASVKNFQLVAAADPSEPTTNVDDETVLLQFGKVDSDMFTMDYRQPLSAFQAFAISLSSFGTKLACE:	Theoretical pI: 9.15	Molecular weight (average): 40476.76
ZmTLP12	MVSWRRSASWLSSASRSSLGTAVGGEAKVTPEADPAAQHDEADEERWSRLLPELLTEIMRRVDAGAERWPPRRDVVVCACVCRRWRDAAVSVVRPPLECGRITFPSSLKQPGPRDAPMHCFIRRDKKNSTFSLYLSLTQALTDKGKFLLAARRFRQGAHTEYIISYDYDDLHPRSSSYVGKLRSDFLGTKFIIYDSQAPYDGAKPSRTRSTRRFASKQISPQVSGGNFEVGQVTYRFNFMKSRGPRRMQCNIQCPVGQGSASDPSKEKTPSPSSLDLKNKAPRWHDHLQCWCLNFHGRVTVASVKNFQLVATAGSGGPWGVGDEETVILQFGKIEDDAFTMDYRQPLSAFQAFAICLTSFGTKLACE:	Theoretical pI: 9.38	Molecular weight (average): 41058.57
ZmTLP3	MPRHTAPAAPPSERGEMDEVVEADPDTEAEDQEERWATLLPELLSDVLLRVEASGAEQWPARKDIVSFACVCRWWRKAAVSVVRPPAESAKITFPSSLKQCHSVSYLTSVFLNLTPFLKTQPGPRENPMQCFIMRNKNSTFYLYLGFTSSPVYKGKFLMAARRLRRGPHTEYIISLDAEDLSQGSNSYMGKLRSDFWGTNFKIYDSKPPYDGAKASSSRSSRRFGSRRISPQVSSGNYEVGQVSYKYNLLKSRGPRRMNCTLECPSAQETWENSLKTKFRRPLGPTTLRNKAPRWHEQLQCWCLNFHGRVTVASVKNFQLVTAAGPSDPTSNVDEETVLLQFGKVDDDIFTMDYRQPLSAFQAFAISLSSFGNKLACE:	Theoretical pI: 9.05	Molecular weight (average): 42701.41
ZmTLP13	MATVPNPKTTRARREPALRPRSNNVAAAPAPAPAVASVRRGPAASAEKENQPPKSLGHGKAAAAATAAEPPKPAEPAPVVAPPPPPLRPSSLQLRMKDEAAAAALPAFVVGPRGRELLPPPSSNYEAWDLSDSESAPASSWATLPNRALLCRPLPQDVGRCTCVIAREAATGARGVALYSLYTNEGQGRQDRKLAVARHRRRRGRSEFVVAQNQDGIFCTADTSFLGAVRANLVGSKYRIWGQGDELKNQSKRLLAVVAFAPTITTLTGSFRSLRAWIPKNQSMQLKANSSAQIQHVSGLPKDWQEKKSRADQLCSRAPFYNHMTKRYELDFRERAGRMGYKVQTSVKNFQMTLEENGRQTVLQLGRVGKSKYIMDFRYPLTGYQAFCICLASIDAKLC…	Theoretical pI: 10.15	Molecular weight (average): 43829.22
AtTLP10	MSFRGIVQDLRDGFGSLSRRSFDFRLSSLHKGKAQGSSFREYSSSRDLLSPVIVQTSRWANLPPELLFDVIKRLEESESNWPARKHVVACASVCRSWRAMCQEIVLGPEICGKLTFPVSLKQPGPRDAMIQCFIKRDKSKLTFHLFLCLSPALLVENGKFLLSAKRTRRTTRTEYIISMDADNISRSSNSYLGKLRSNFLGTKFLVYDTQPPPNTSSSALITDRTSRSRFHSRRVSPKVPSGSYNIAQITYELNVLGTRGPRRMHCIMNSIPISSLEPGGSVPNQPEKLVPAPYSLDDSFRSNISFSKSSFDHRSLDFSSSRFSEMGISCDDNEEEASFRPLILKNKQPRWHEQLQCWCLNFRGRVTVASVKNFQLVAARQPQPQGTGAAAAPTSAPAH…	Theoretical pI: 9.61	Molecular weight (average): 50010.17
AtTLP3	MSFKSLIQDMRGELGSISRKGFDVRFGYGRSRSQRVVQDTSVPVDAFKQSCWASMPPELLRDVLMRIEQSEDTWPSRKNVVSCAGVCRNWREIVKEIVRVPELSSKLTFPISLKQPGPRGSLVQCYIMRNRSNQTYYLYLGLNQAAASNDDGKFLLAAKRFRRPTCTDYIISLNCDDVSRGSNTYIGKLRSNFLGTKFTVYDAQPTNPGTQVTRTRSSRLLSLKQVSPRIPSGNYPVAHISYELNVLGSRGPRRMQCVMDAIPASAVEPGGTAPTQTELVHSNLDSFPSFSFFRSKSIRAESLPSGPSSAAQKEGLLVLKNKAPRWHEQLQCWCLNFNGRVTVASVKNFQLVAAPENGPAGPEHENVILQFGKVGKDVFTMDYQYPISAFQAFTICLSS…	Theoretical pI: 9.49	Molecular weight (average): 45382.84
AtTLP1	MSFRSIVRDVRDSIGSLSRRSFDFKLSSLNKEGGKSRGSVQDSHEEQLVVTIQETPWANLPPELLRDVIKRLEESESVWPARRHVVACASVCRSWRDMCKEIVQSPELSGKITFPVSLKQPGPRDATMQCFIKRDKSNLTYHLYLCLSPALLVENGKFLLSAKRIRRTTYTEYVISMHADTISRSSNTYIGKIRSNFLGTKFIIYDTQPAYNSNIARAVQPVGLSRRFYSKRVSPKVPSGSYKIAQVSYELNVLGTRGPRRMHCAMNSIPASSLAEGGTVPGQPDIIVPRSILDESFRSITSSSSRKITYDYSNDFSSARFSDILGPLSEDQEVVLEEGKERNSPPLVLKNKPPRWHEQLQCWCLNFRGRVTVASVKNFQLIAANQPQPQPQPQPQPQP…	Theoretical pI: 9.46	Molecular weight (average): 51194.50
AtTLP5	MSFLSIVRDVRDTVGSFSRRSFDVRVSNGTTHQRSKSHGVEAHIEDLIVIKNTRWANLPAALLRDVMKKLDESESTWPARKQVVACAGVCKTWRLMCKDIVKSPEFSGKLTFPVSLKQPGPRDGIIQCYIKRDKSNMTYHLYLSLSPAILVESGKFLLSAKRSRRATYTEYVISMDADNISRSSSTYIGKLKSNFLGTKFIVYDTAPAYNSSQILSPPNRSRSFNSKKVSPKVPSGSYNIAQVTYELNLLGTRGPRRMNCIMHSIPSLALEPGGTVPSQPEFLQRSLDESFRSIGSSKIVNHSGDFTRPKEEEGKVRPLVLKTKPPRWLQPLRCWCLNFKGRVTVASVKNFQLMSAATVQPGSGSDGGALATRPSLSPQQPEQSNHDKIILHFGKVGKD…	Theoretical pI: 9.85	Molecular weight (average): 47845.01
AtTLP2	MSLKSILRDLKEVRDGLGGISKRSWSKSSHIAPDQTTPPLDNIPQSPWASLPPELLHDIIWRVEESETAWPARAAVVSCASVCKSWRGITMEIVRIPEQCGKLTFPISLKQPGPRDSPIQCFIKRNRATATYILYYGLMPSETENDKLLLAARRIRRATCTDFIISLSAKNFSRSSSTYVGKLRSGFLGTKFTIYDNQTASSTAQAQPNRRLHPKQAAPKLPTNSSTVGNITYELNVLRTRGPRRMHCAMDSIPLSSVIAEPSVVQGIEEEVSSSPSPKGETITTDKEIPDNSPSLRDQPLVLKNKSPRWHEQLQCWCLNFKGRVTVASVKNFQLVAEIDASLDAPPEEHERVILQFGKIGKDIFTMDYRYPLSAFQAFAICISSFDTKPACEG:	Theoretical pI: 9.10	Molecular weight (average): 43878.24
AtTLP11	MTLRSLILEMRSRPHRVVHDLAAAAAADSTSVSSQDYRWSEIPEELLREILIRVEAADGGGWPSRRSVVACAGVCRGWRLLMNETVVVPEISSKLTFPISLKQPGPRDSLVQCFIKRNRITQSYHLYLGLTNSLTDDGKFLLAACKLKHTTCTDYIISLRSDDMSRRSQAYVGKVRSNFLGTKFTVFDGNLLPSTGAAKLRKSRSYNPAKVSAKVPLGSYPVAHITYELNVLGSRGPRKMQCLMDTIPTSTMEPQGVASEPSEFPLLGTRSTLSRSQSKPLRSSSSHLKETPLVLSNKTPRWHEQLRCWCLNFHGRVTVASVKNFQLVAAGASCGSGTGMSPERQSERIILQFGKVGKDMFTMDYGYPISAFQAFAICLSSFETRIACE:	Theoretical pI: 9.59	Molecular weight (average): 43050.57
AtTLP6	MDLSLLLPKRSWEISGGADKIRVAMSLKNIVKNKYKAIGRRGRSHIAPEGSSVSSSLSTNEGLNQSIWVDLPPELLLDIIQRIESEQSLWPGRRDVVACASVCKSWREMTKEVVKVPELSGLITFPISLRQPGPRDAPIQCFIKRERATGIYRLYLGLSPALSGDKSKLLLSAKRVRRATGAEFVVSLSGNDFSRSSSNYIGKLRSNFLGTKFTVYENQPPPFNRKLPPSMQVSPWVSSSSSSYNIASILYELNVLRTRGPRRMQCIMHSIPISAIQEGGKIQSPTEFTNQGKKKKKPLMDFCSGNLGGESVIKEPLILKNKSPRWHEQLQCWCLNFKGRVTVASVKNFQLVAAAAEAGKNMNIPEEEQDRVILQFGKIGKDIFTMDYRYPISAFQAFA…	Theoretical pI: 9.74	Molecular weight (average): 45978.26
AtTLP9	MTFRSLLQEMRSRPHRVVHAAASTANSSDPFSWSELPEELLREILIRVETVDGGDWPSRRNVVACAGVCRSWRILTKEIVAVPEFSSKLTFPISLKQSGPRDSLVQCFIKRNRNTQSYHLYLGLTTSLTDNGKFLLAASKLKRATCTDYIISLRSDDISKRSNAYLGRMRSNFLGTKFTVFDGSQTGAAKMQKSRSSNFIKVSPRVPQGSYPIAHISYELNVLGSRGPRRMRCIMDTIPMSIVESRGVVASTSISSFSSRSSPVFRSHSKPLRSNSASCSDSGNNLGDPPLVLSNKAPRWHEQLRCWCLNFHGRVTVASVKNFQLVAVSDCEAGQTSERIILQFGKVGKDMFTMDYGYPISAFQAFAICLSSFETRIACE:	Theoretical pI: 9.78	Molecular weight (average): 42310.44
AtTLP7	MPLSRSLLSRRISNSFRFHQGETTTAPESESIPPPSNMAGSSSWSAMLPELLGEIIRRVEETEDRWPQRRDVVTCACVSKKWREITHDFARSSLNSGKITFPSCLKLPGPRDFSNQCLIKRNKKTSTFYLYLALTPSFTDKGKFLLAARRFRTGAYTEYIISLDADDFSQGSNAYVGKLRSDFLGTNFTVYDSQPPHNGAKPSNGKASRRFASKQISPQVPAGNFEVGHVSYKFNLLKSRGPRRMVSTLRCPSPSPSSSSAGLSSDQKPCDVTKIMKKPNKDGSSLTILKNKAPRWHEHLQCWCLNFHGRVTVASVKNFQLVATVDQSQPSGKGDEETVLLQFGKVGDDTFTMDYRQPLSAFQAFAICLTSFGTKLACE:	Theoretical pI: 9.61	Molecular weight (average): 42177.94
AtTLP8	MAGSRKVNDLLEENKGNVDTITGSLSTQKGEDKENVSPEKVSTSVETRKLDRALKSQSMKGNSGFPTEVTNFKSFSTGGRTALKQSSLQACMQKNSEVDKSSFGMKTWTSVDSEHSSSLKVWEFSDSEAAPASSWSTLPNRALLCKTLPLDVGRCTCLIVKEQSPEGLSHGSVYSLYTHEGRGRKDRKLAVAYHSRRNGKSIFRVAQNVKGLLCSSDESYVGSMTANLLGSKYYIWDKGVRVGSVGKMVKPLLSVVIFTPTITTWTGSYRRMRTLLPKQQPMQKNNNKQVQQASKLPLDWLENKEKIQKLCSRIPHYNKISKQHELDFRDRGRTGLRIQSSVKNFQLTLTETPRQTILQMGRVDKARYVIDFRYPFSGYQAFCICLASIDSKLCCTV:	Theoretical pI: 9.69	Molecular weight (average): 44487.84
AtTLP4	MPPELLRDVLMRIERSEDTWPSRKNVVSCVGVCKNWRQIFKEIVNVPEVSSKFTFPISLKQPGPGGSLVQCYVKRNRSNQTFYLYLGGEAKIFCQSEPSEPNKSIWKLSLKPGGTATTQTELDNFVSFRSPSGQKEGVLVLKSKVPRLEEQSWCLDFNGWRDIVSSGKKFQLVALLRTNLRMKTTFSSLRKSETCTNSSYEAEWIPLVRTSVFAVIARVCRDKKHTPSYELKLALYFAKNSAILKKFVLRGYTREEDLLALPVAN:	Theoretical pI: 9.65	Molecular weight (average): 30183.97
